# Supplementary material for: Facile assembly of 1,5-diazocan-2-ones via cyclization of tethered sulfonamides to cyclopropenes
Source: Royal Society of Chemistry journal article supplement (doi:10.1039/d0ra09014j), 2020-01-01

## Facile Assembly of 1,5-Diazocan-2-ones via Cyclization of Tethered Sulfonamides to Cyclopropenes

Jonathon P. Matheny,<sup>a</sup> Pavel M. Yamanushkin,<sup>a</sup> Peter A. Petillo,<sup>b</sup> and Michael Rubin\*<sup>a,c</sup>

<sup>a</sup> Department of Chemistry, University of Kansas, 1567 Irving Hill Road, Lawrence, KS 66045-7582, USA.

Fax: +1-785-864-5396; Tel: +1-785-864- 5071, E-mail: [mrubin@ku.edu](mailto:mrubin@ku.edu)

<sup>b</sup> Design-Zyme LLC, 4950 Research Park Way, Lawrence KS 66047, USA

<sup>c</sup> Department of Chemistry, North Caucasus Federal University, 1a Pushkin St., Stavropol 355009, Russian Federation.

## Supporting Information

# $^1\text{H}$ and $^{13}\text{C}$ NMR Spectral Charts

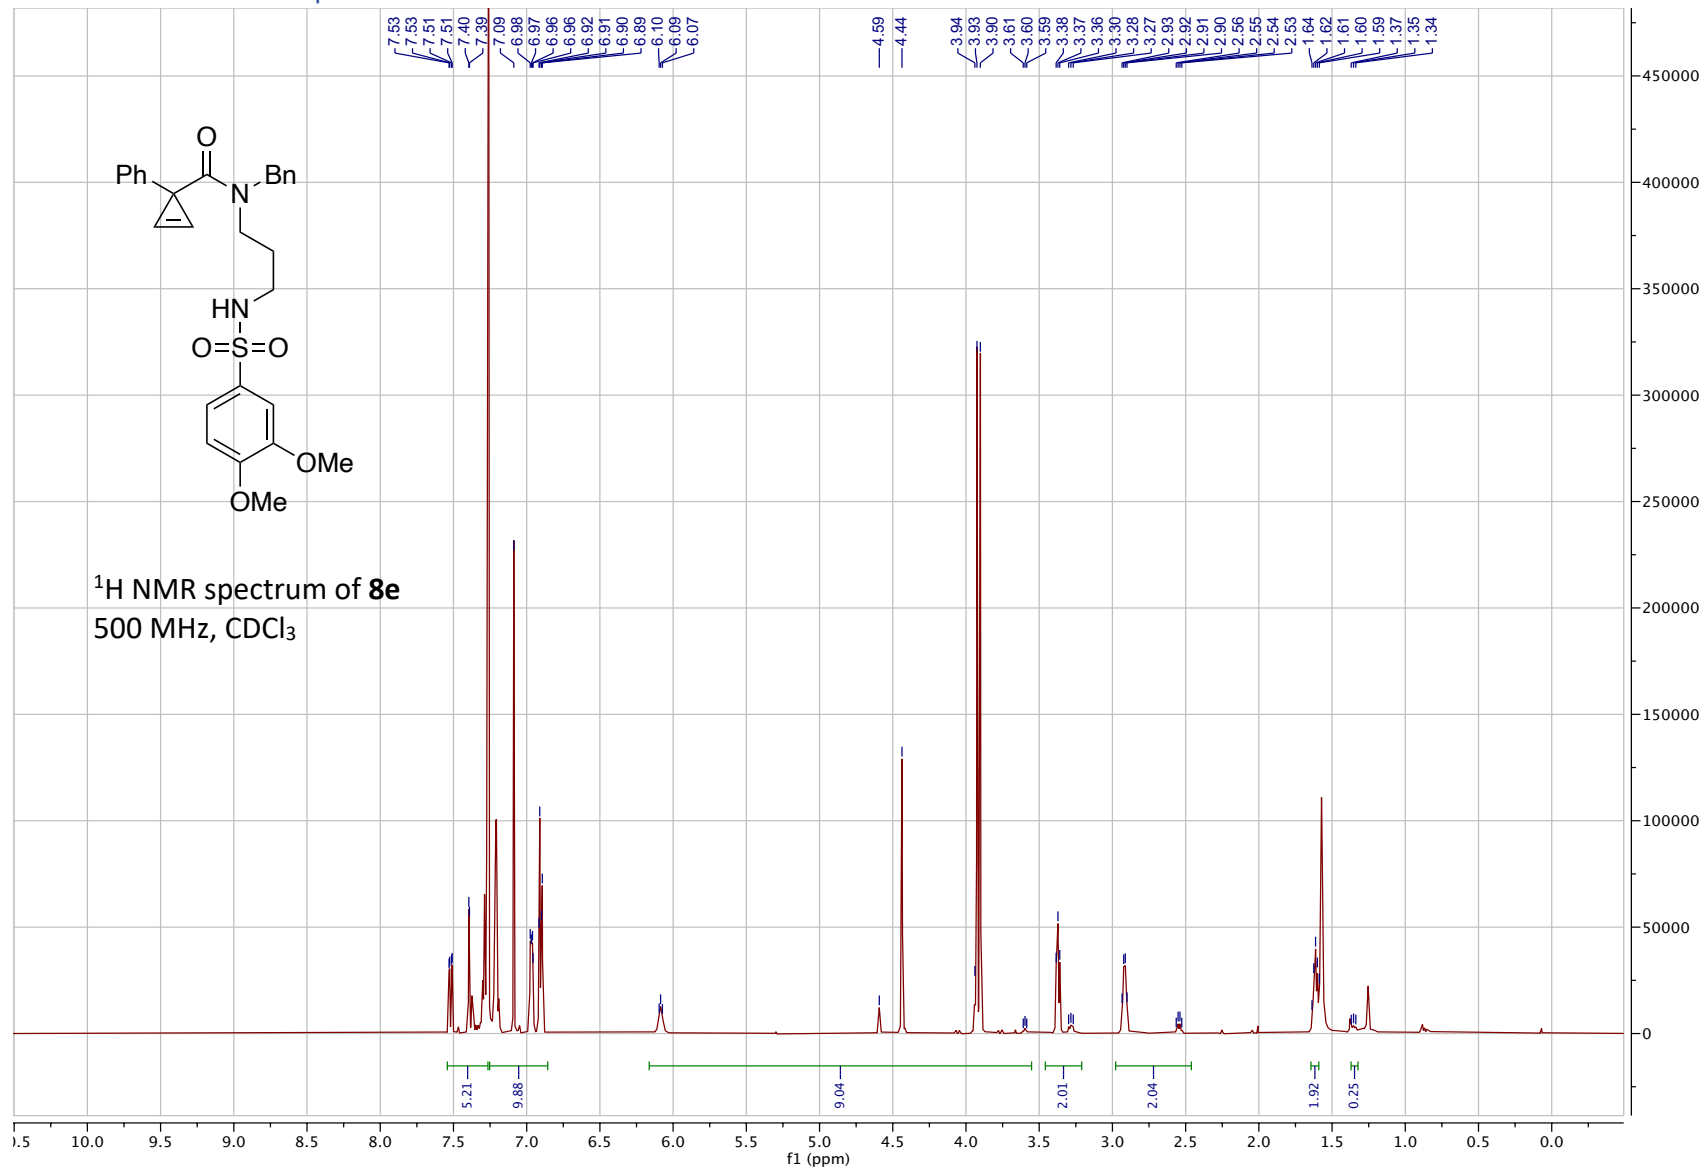

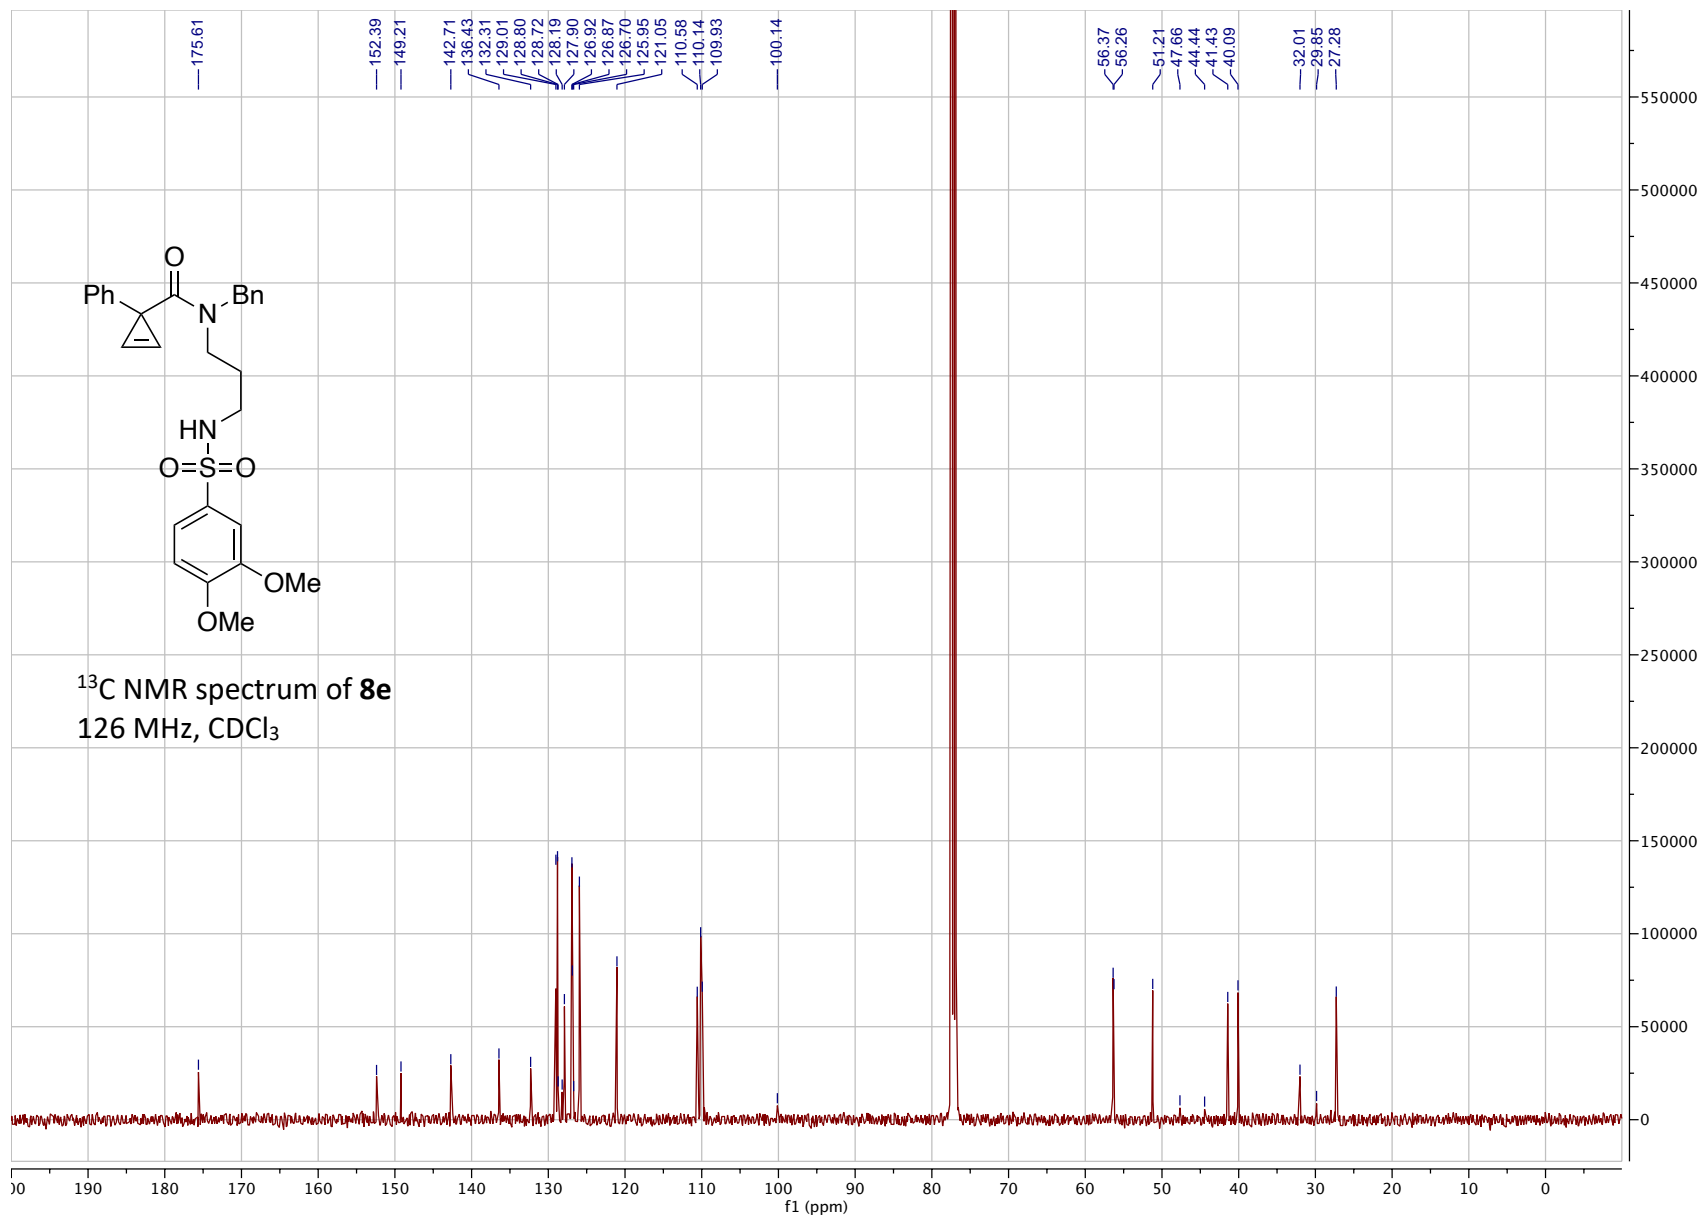

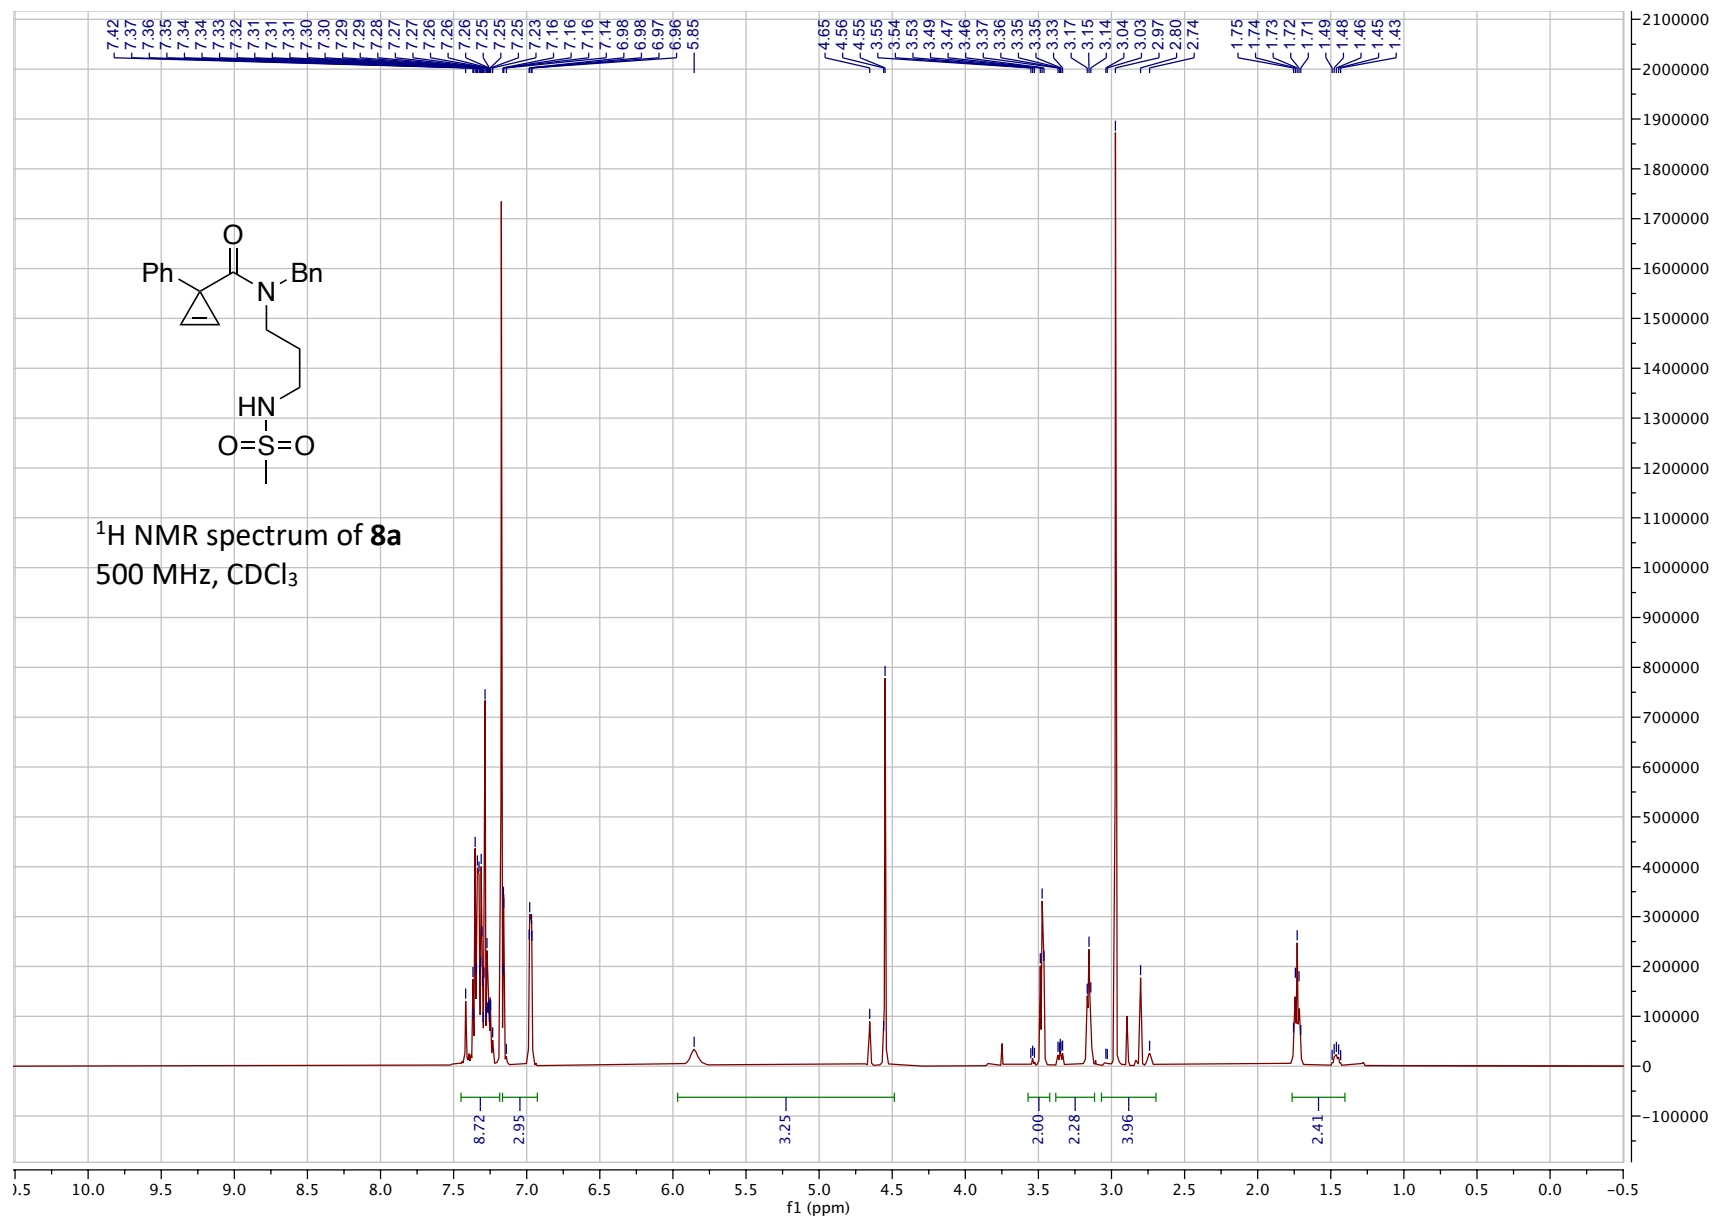

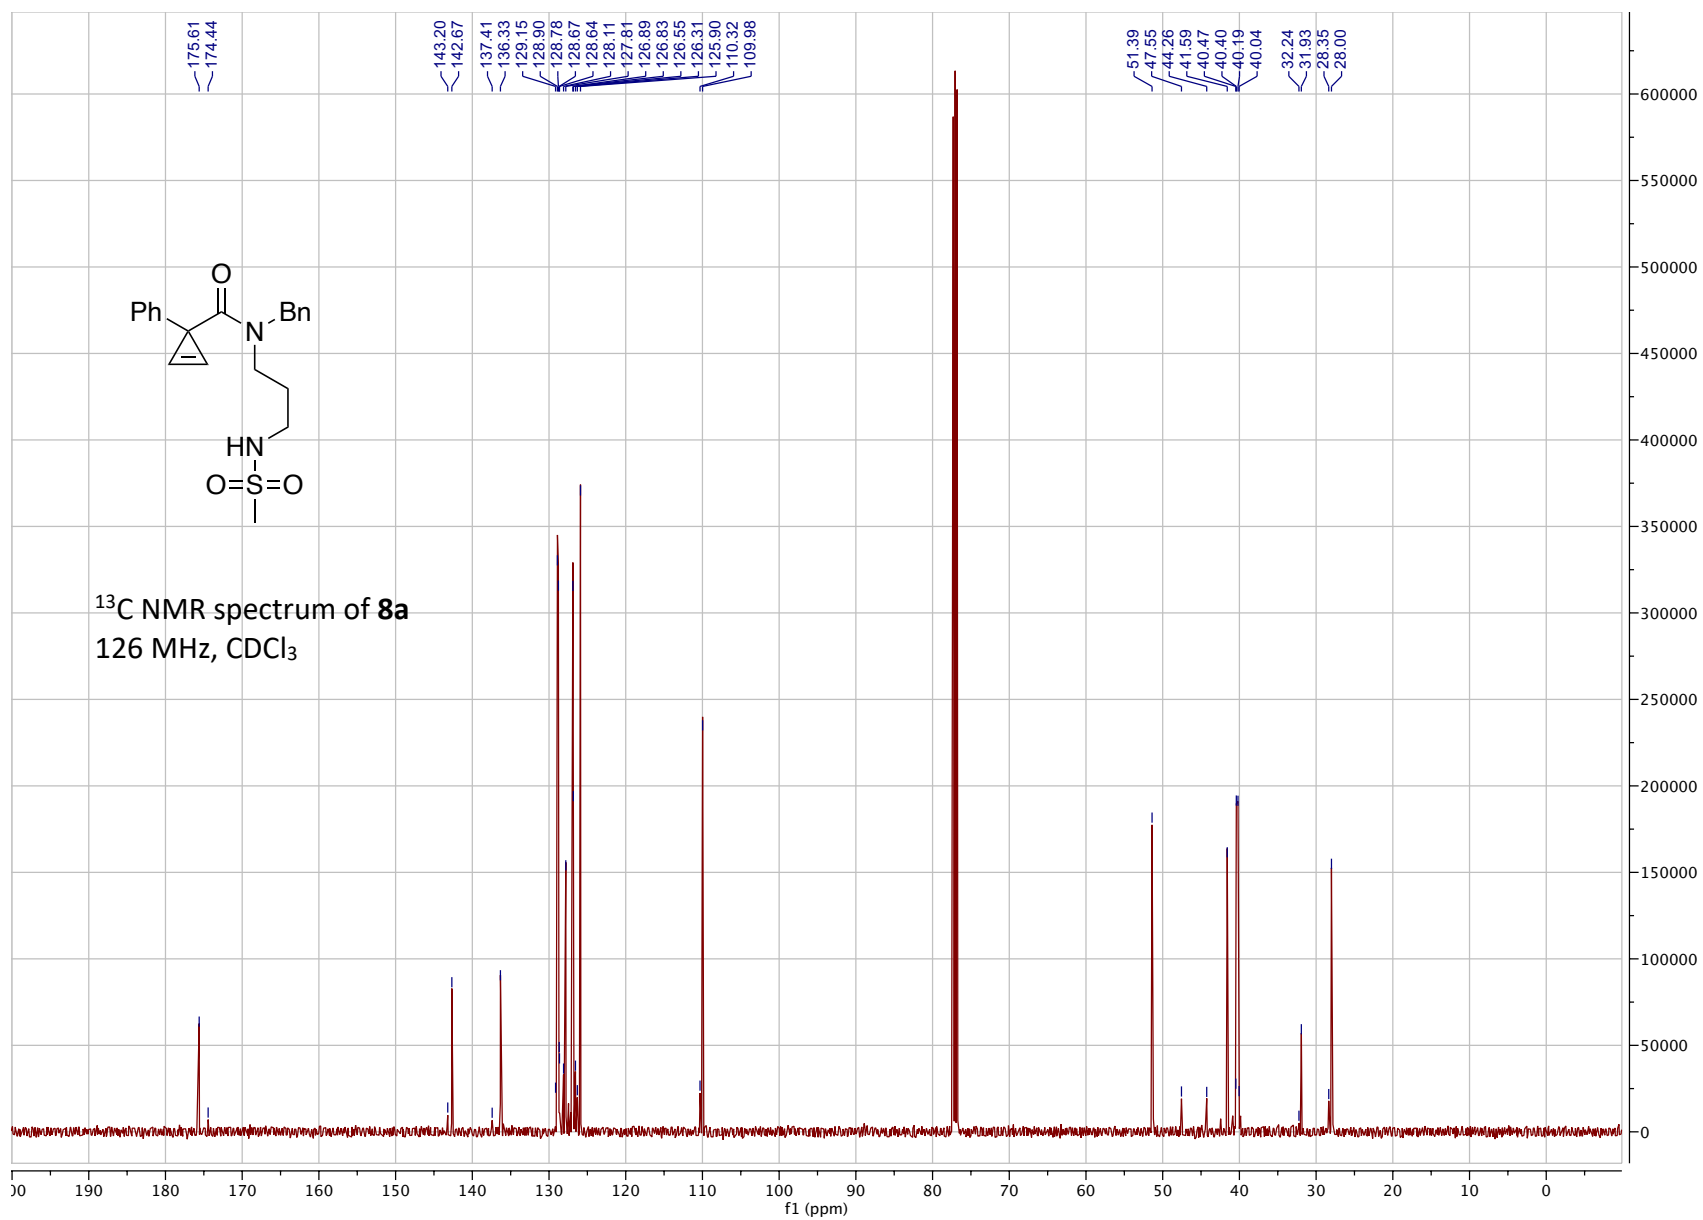

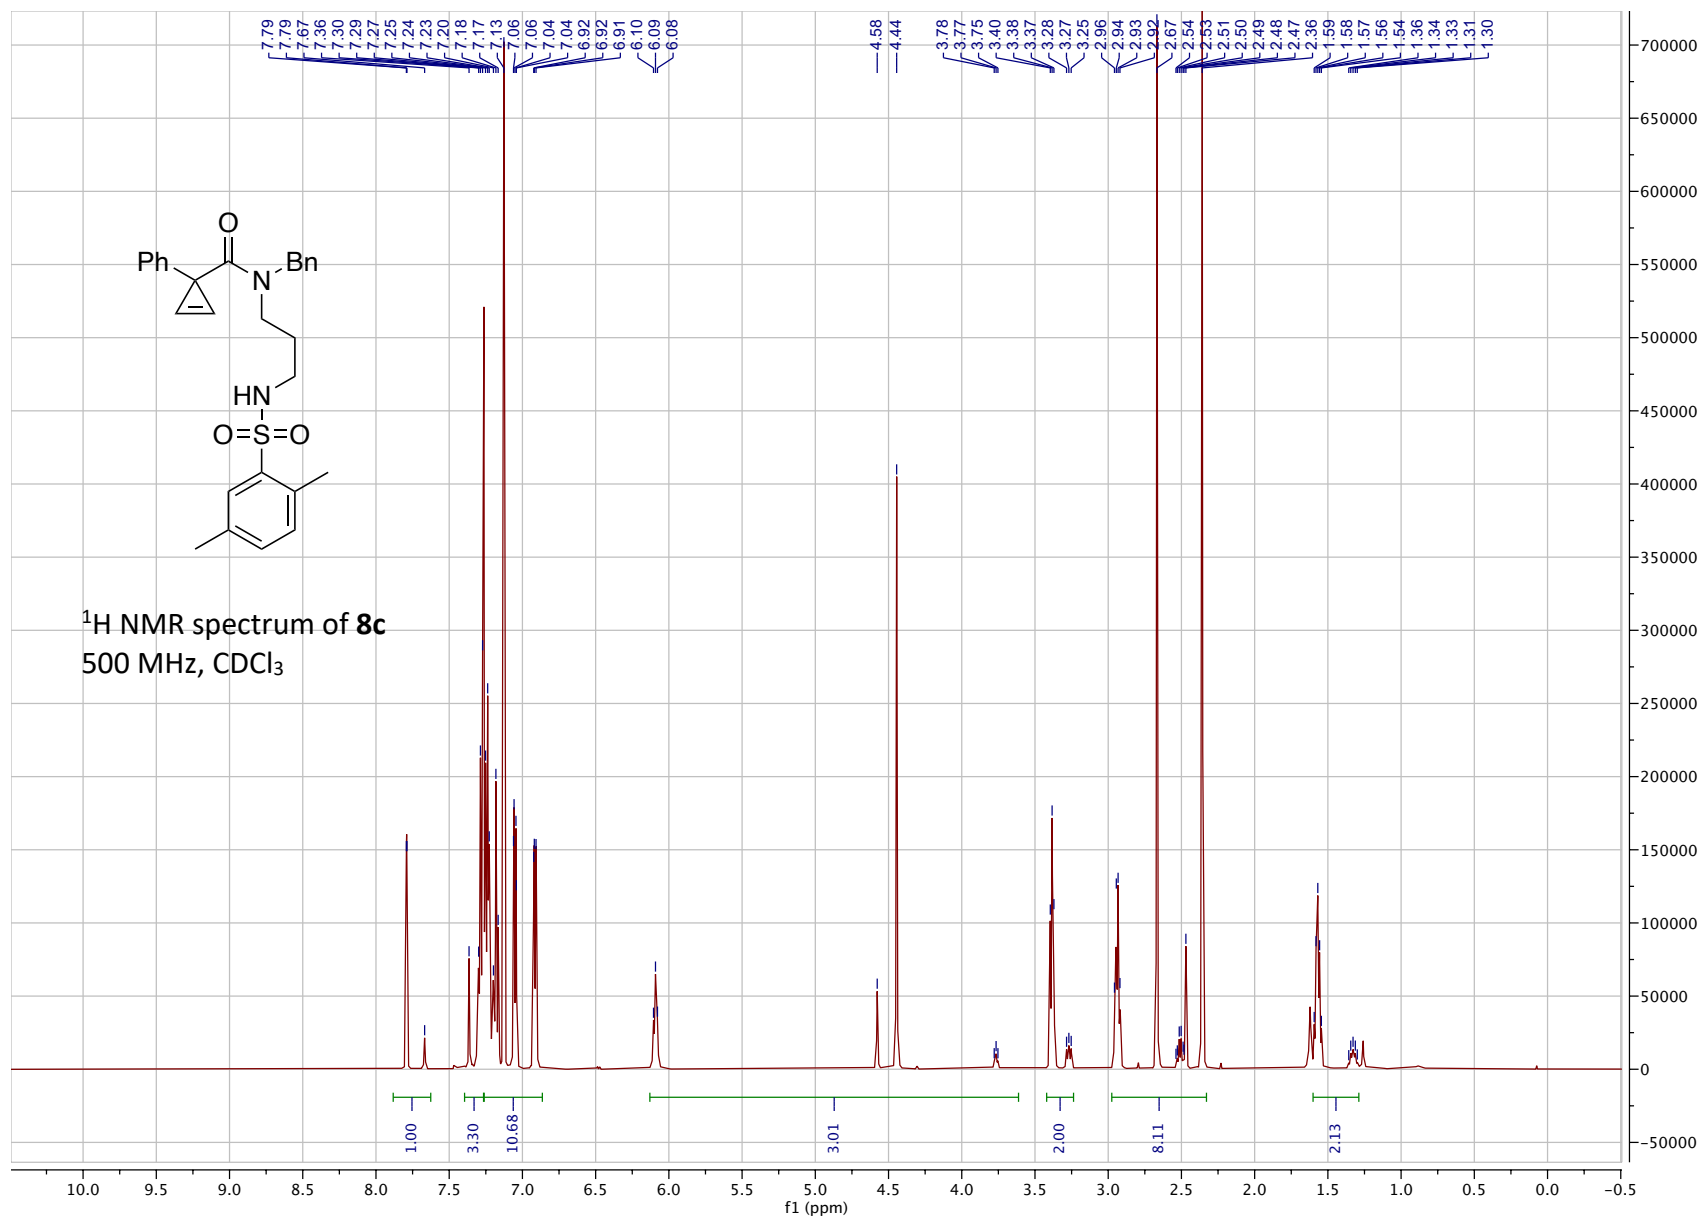

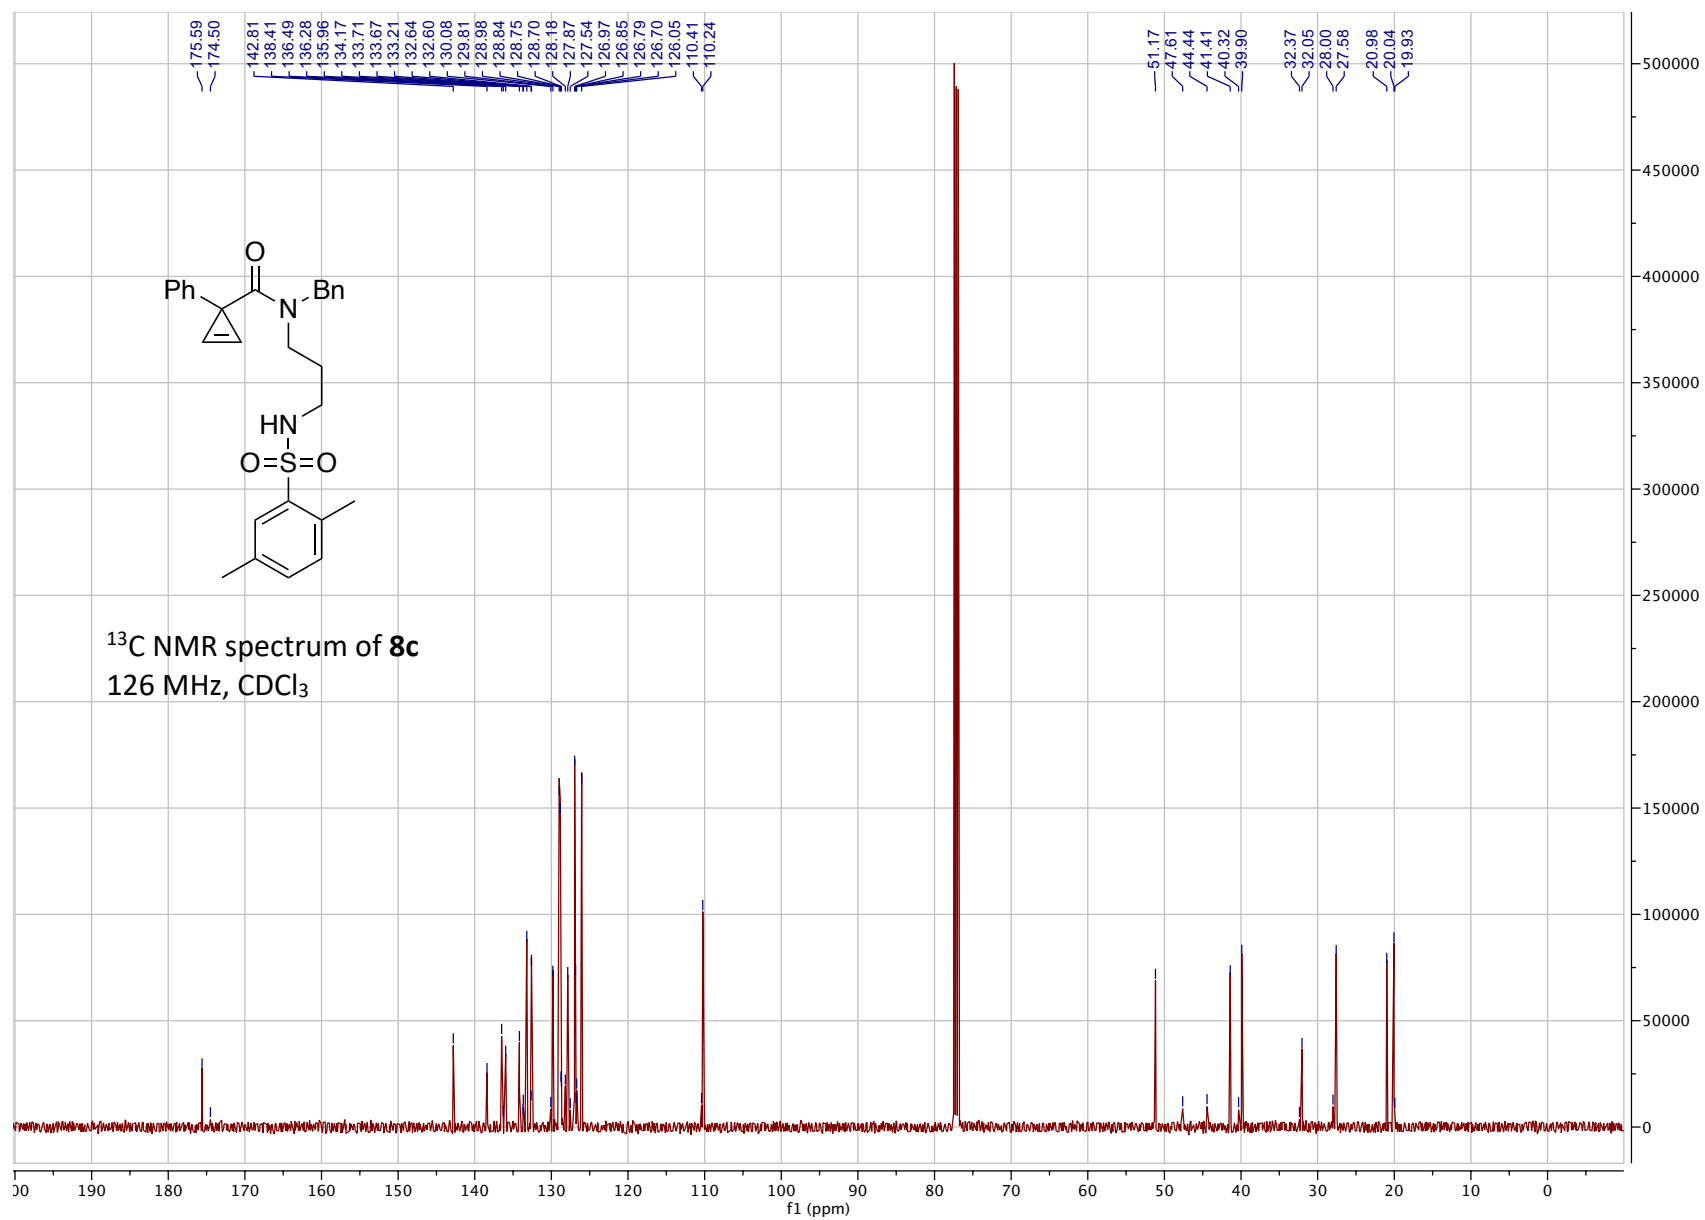

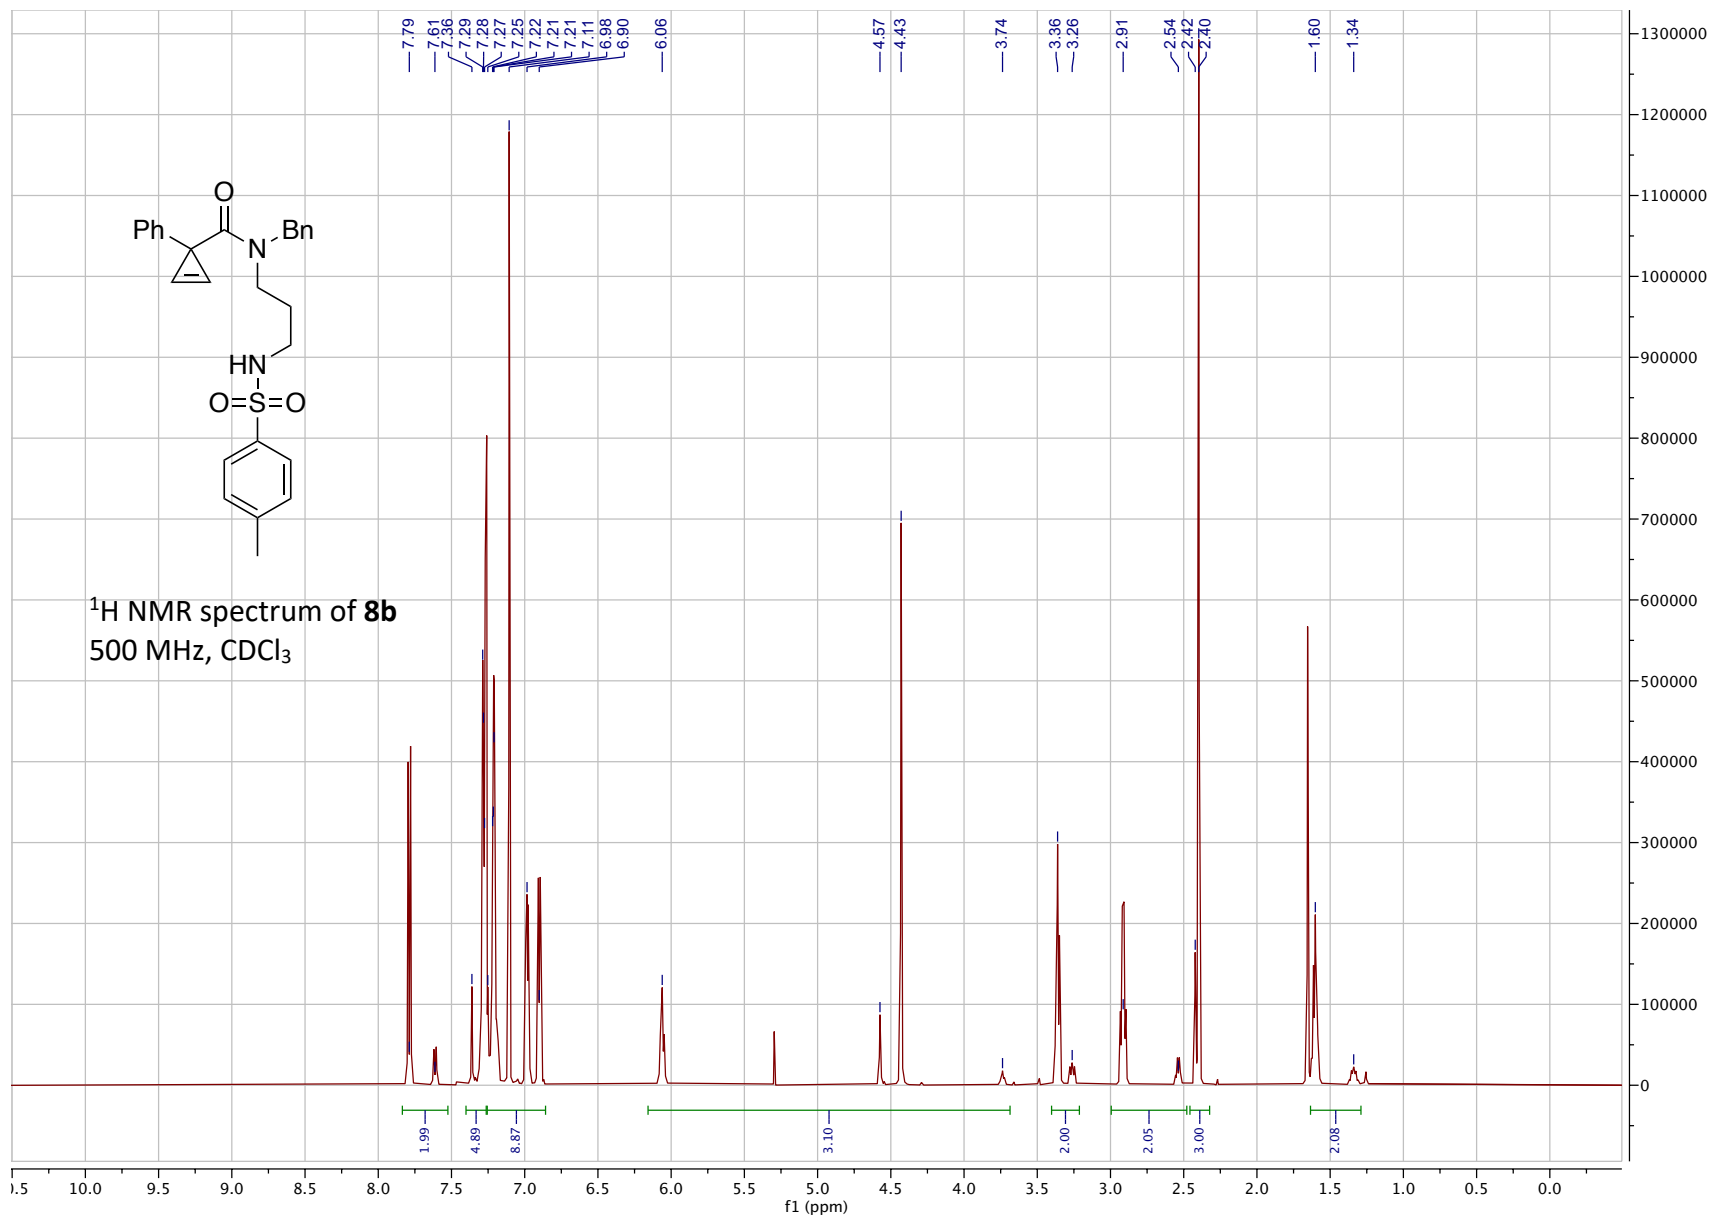



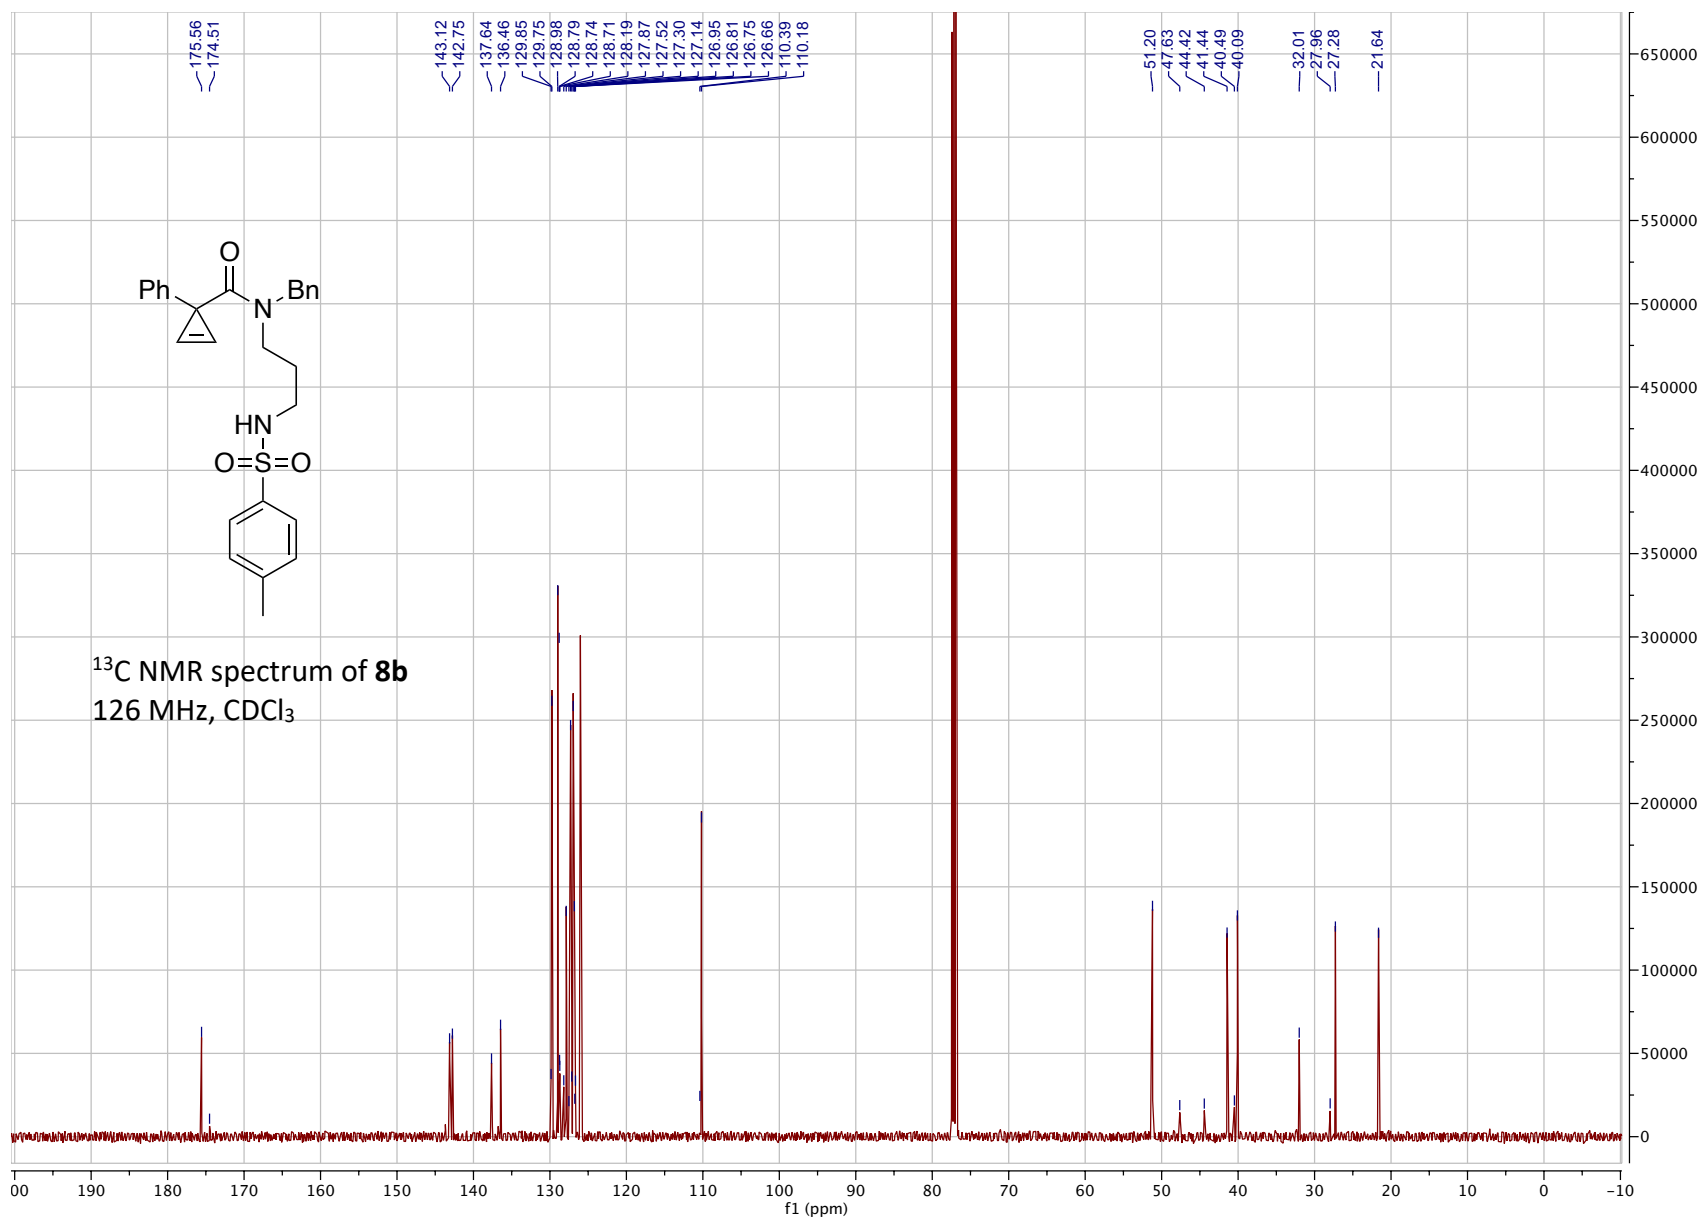

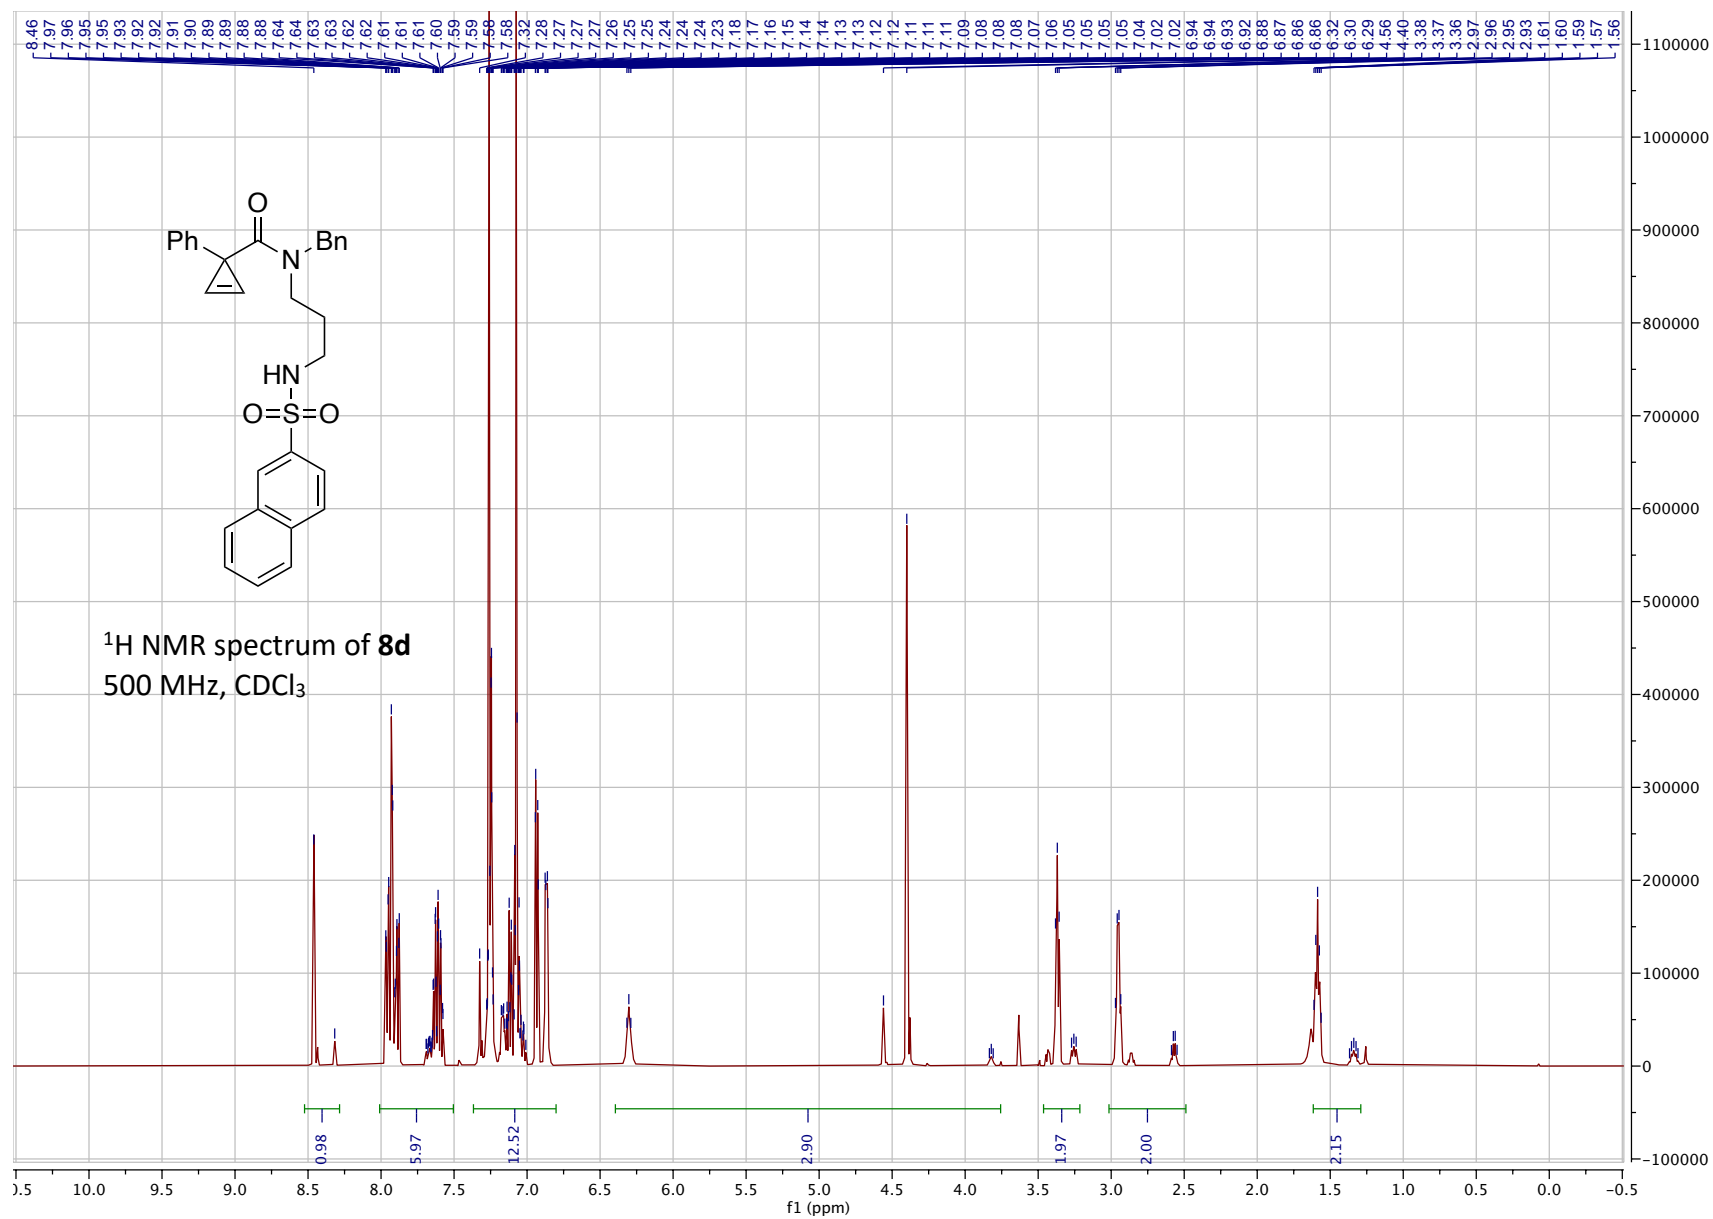

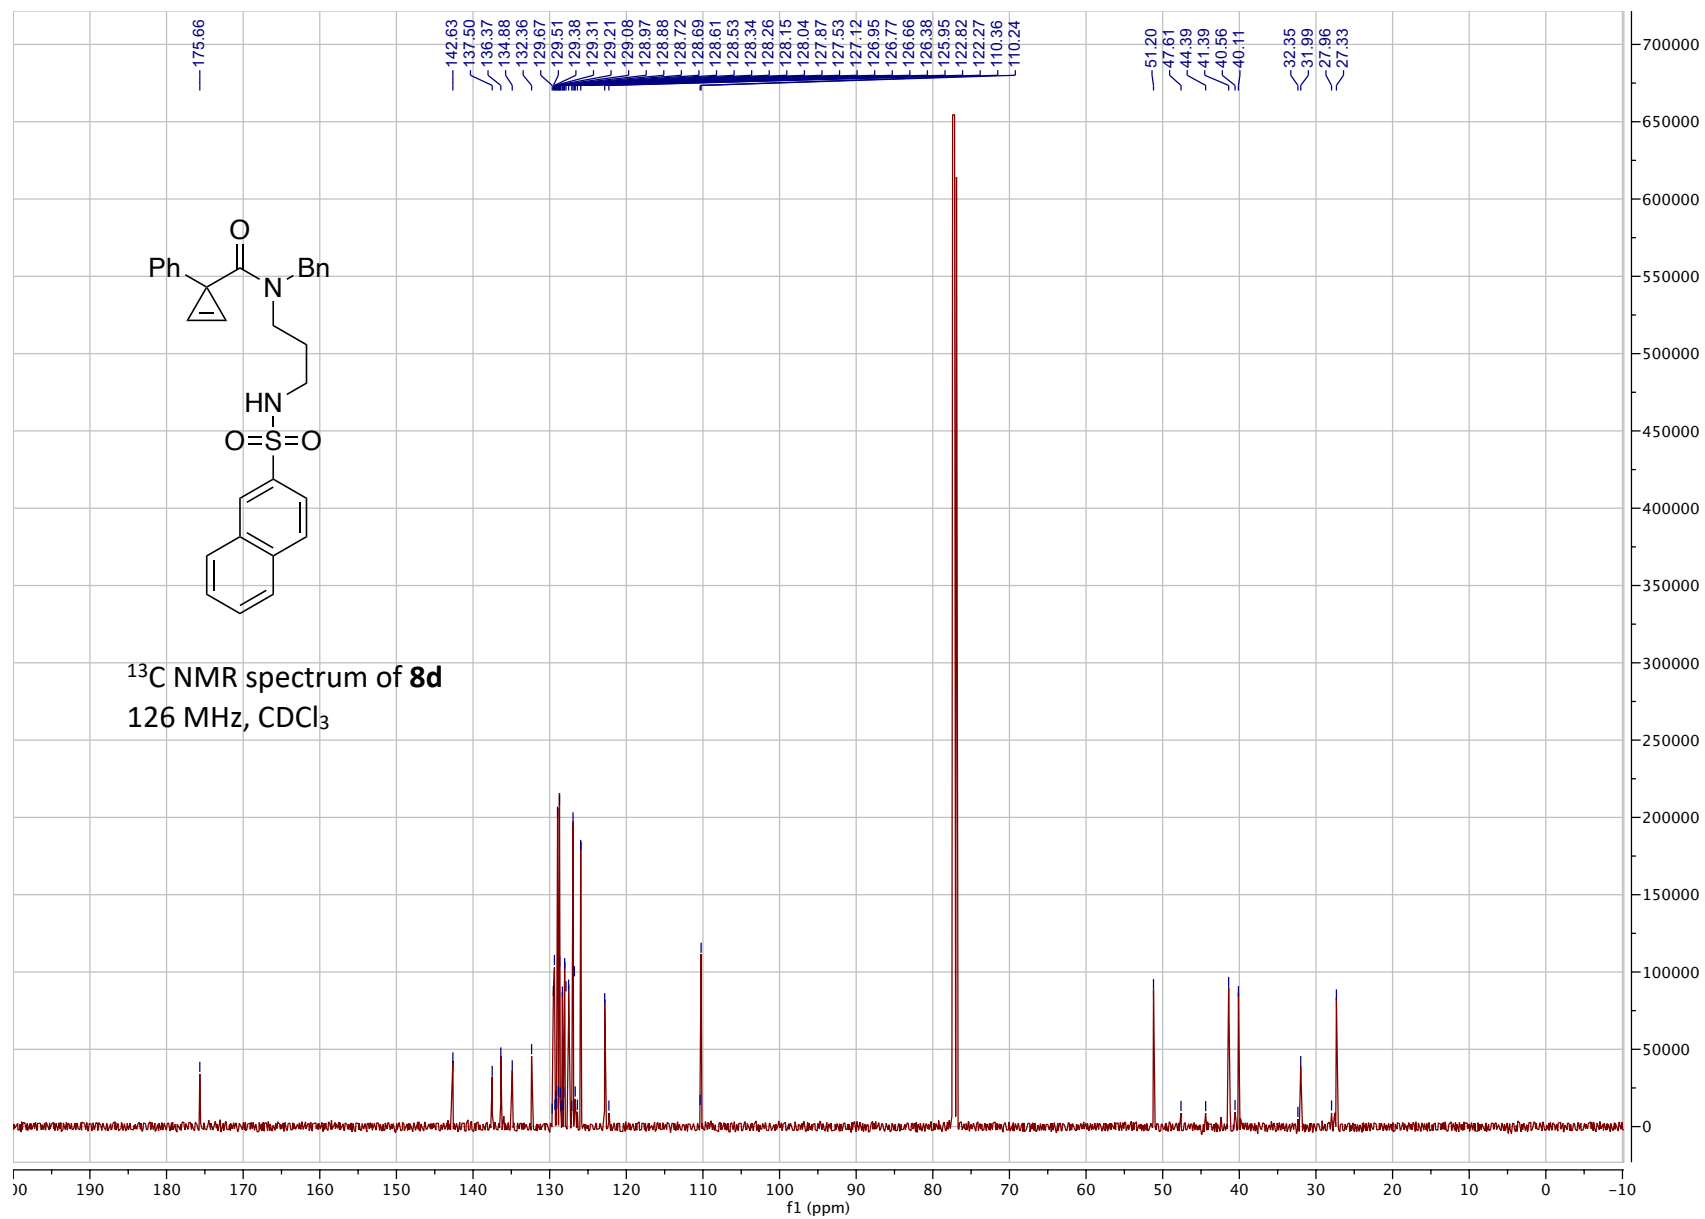

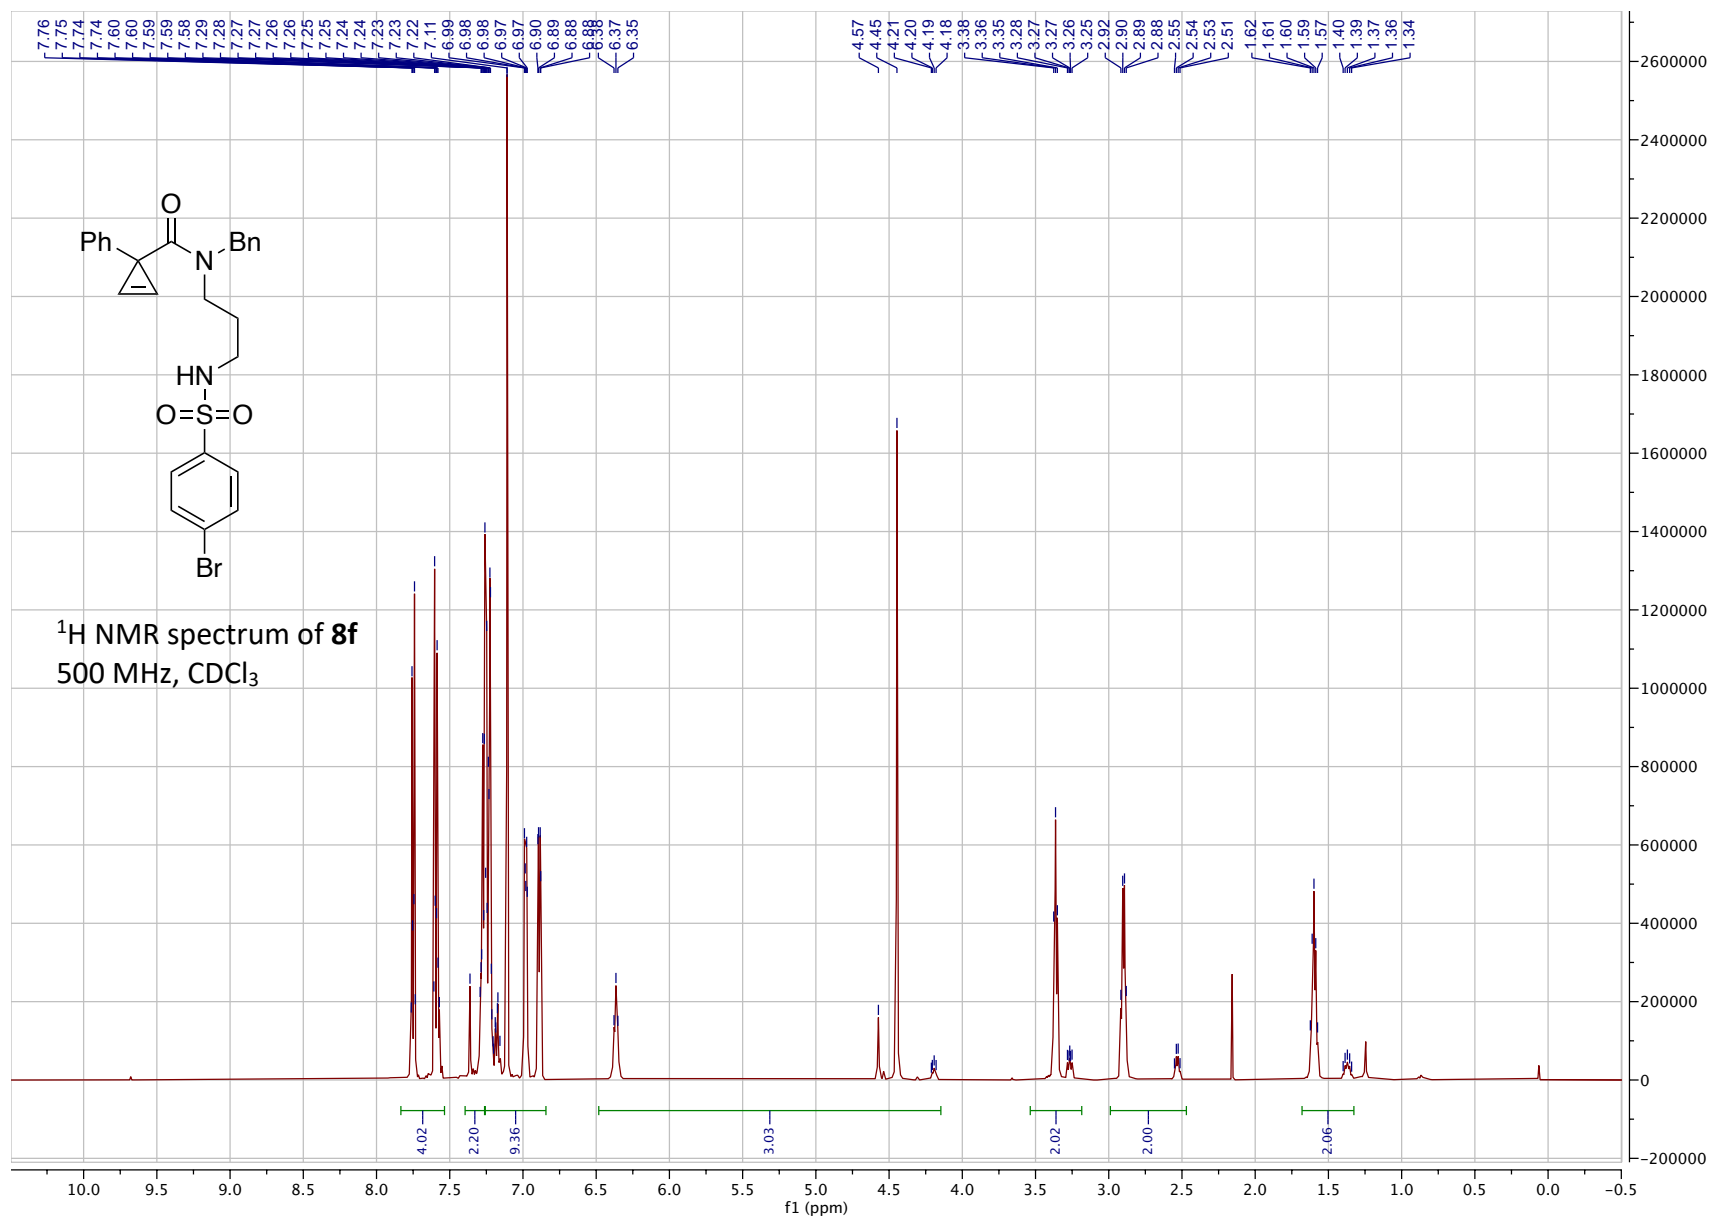

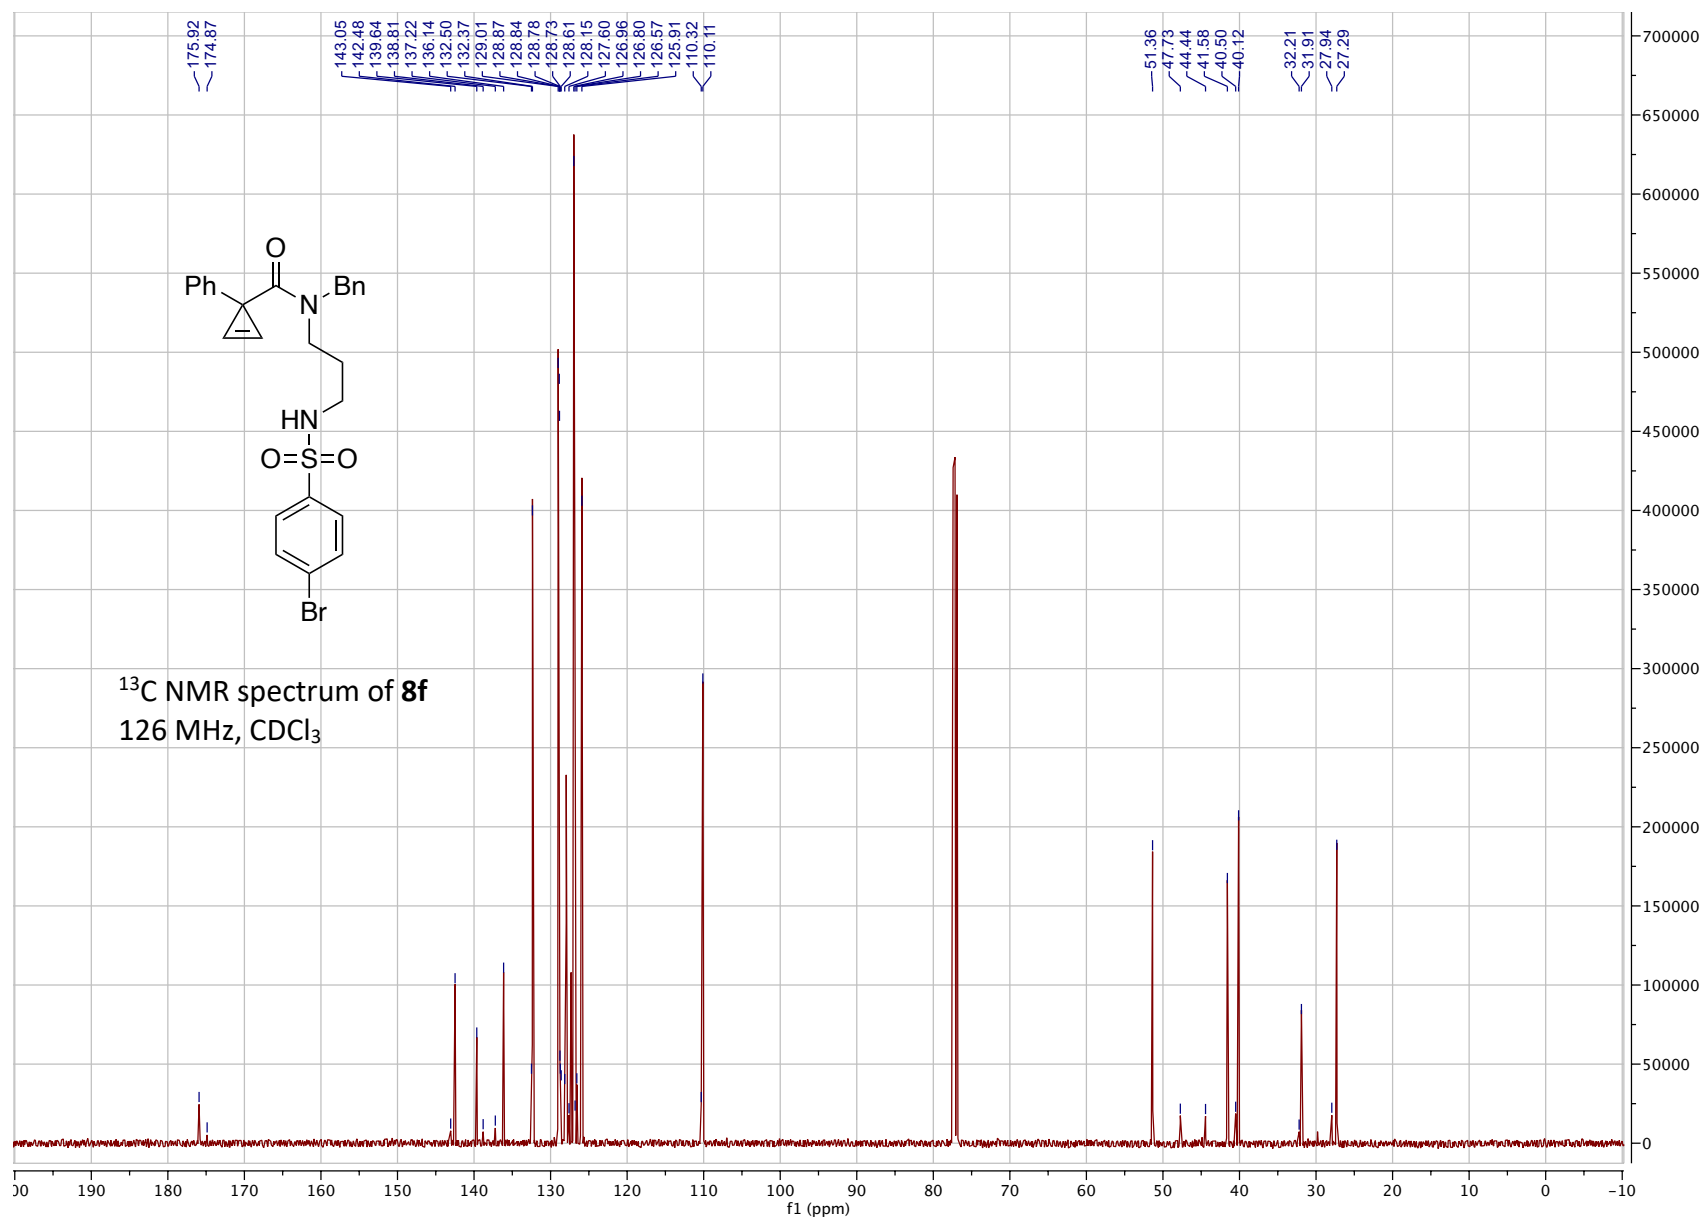

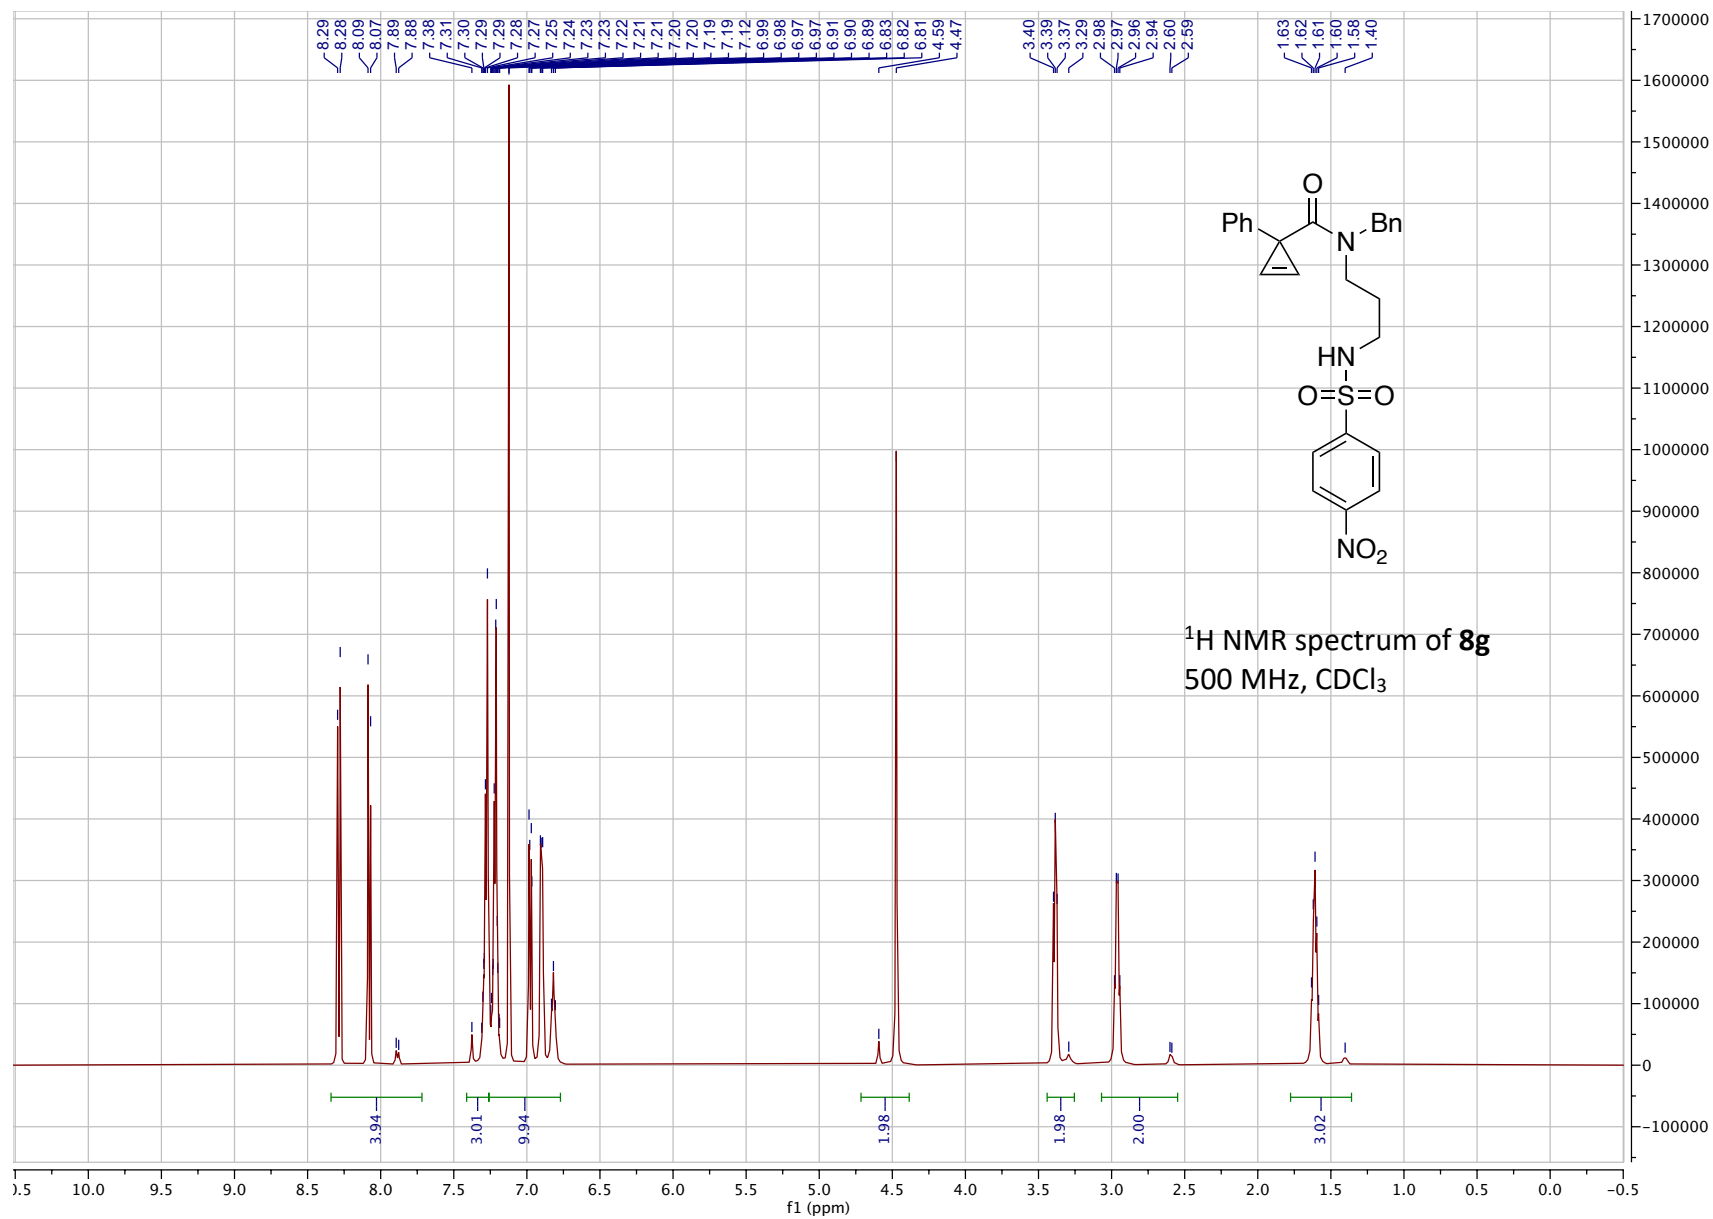

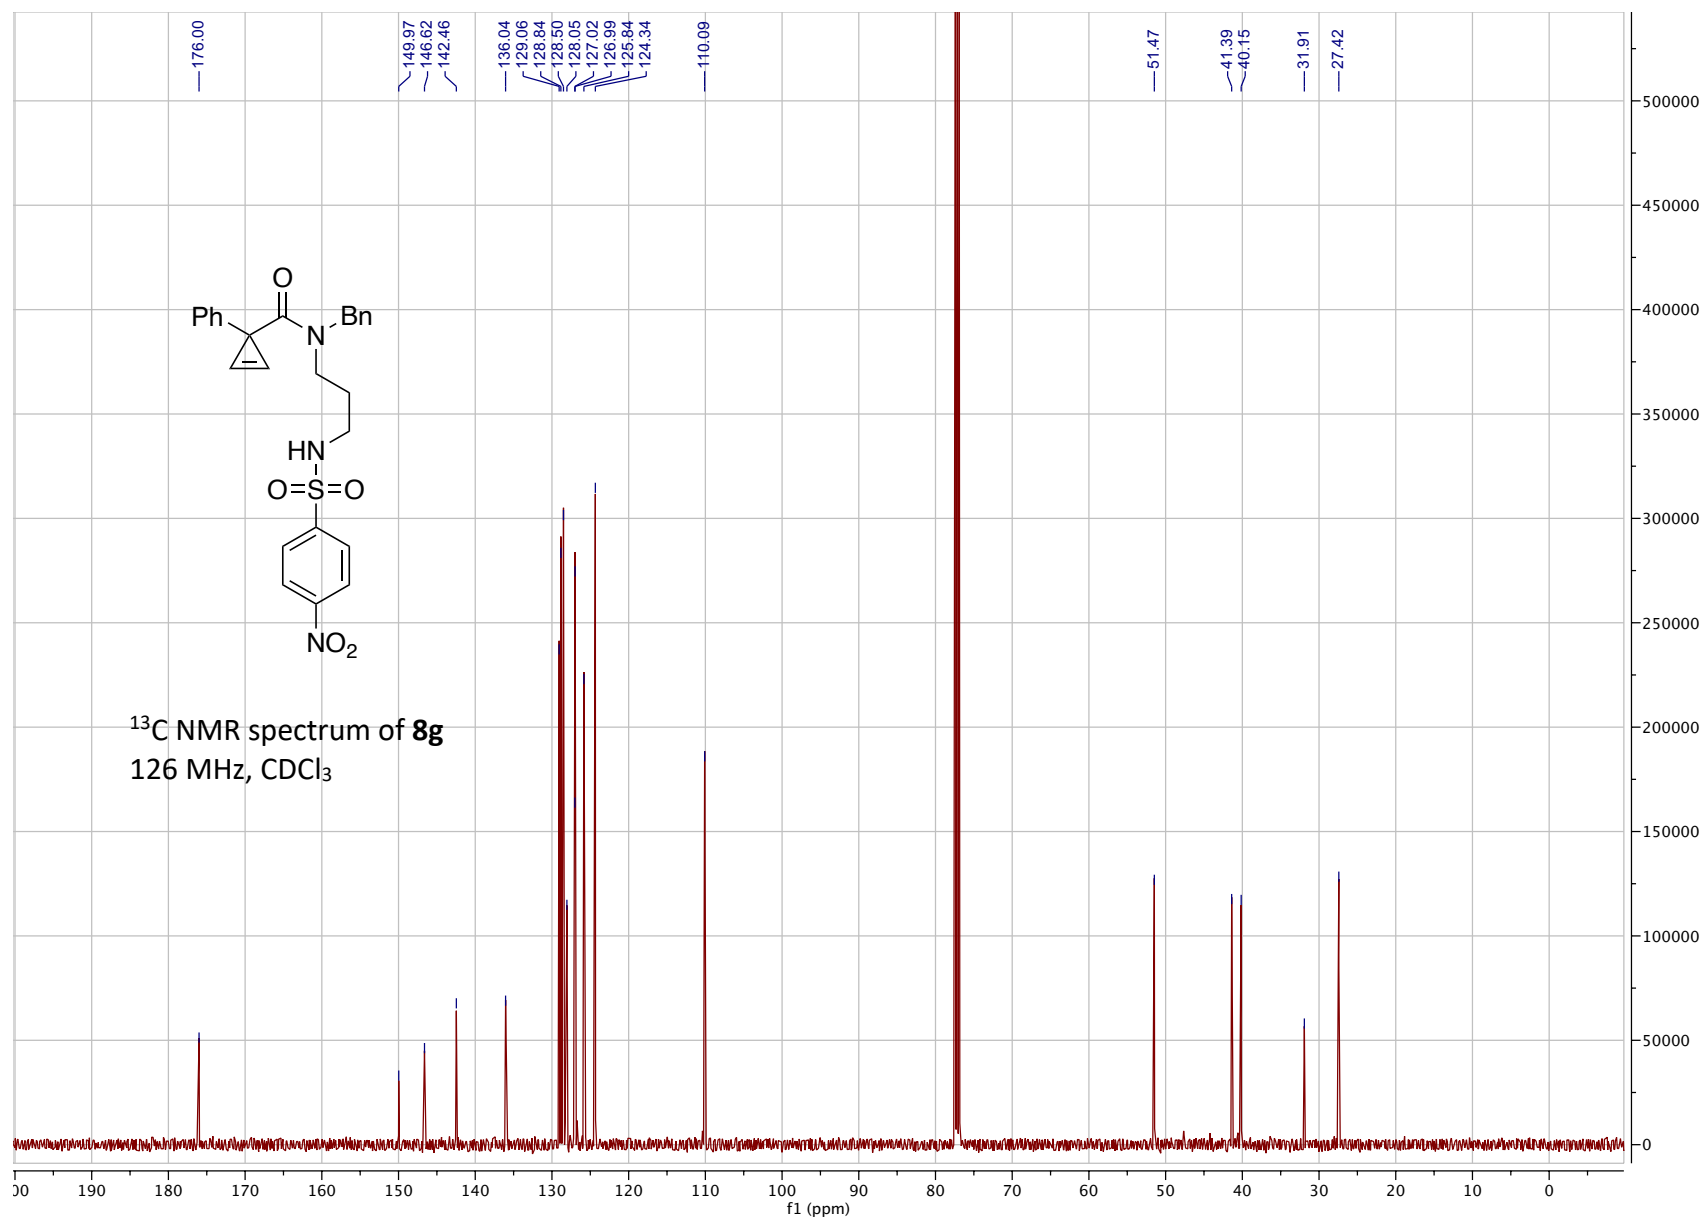

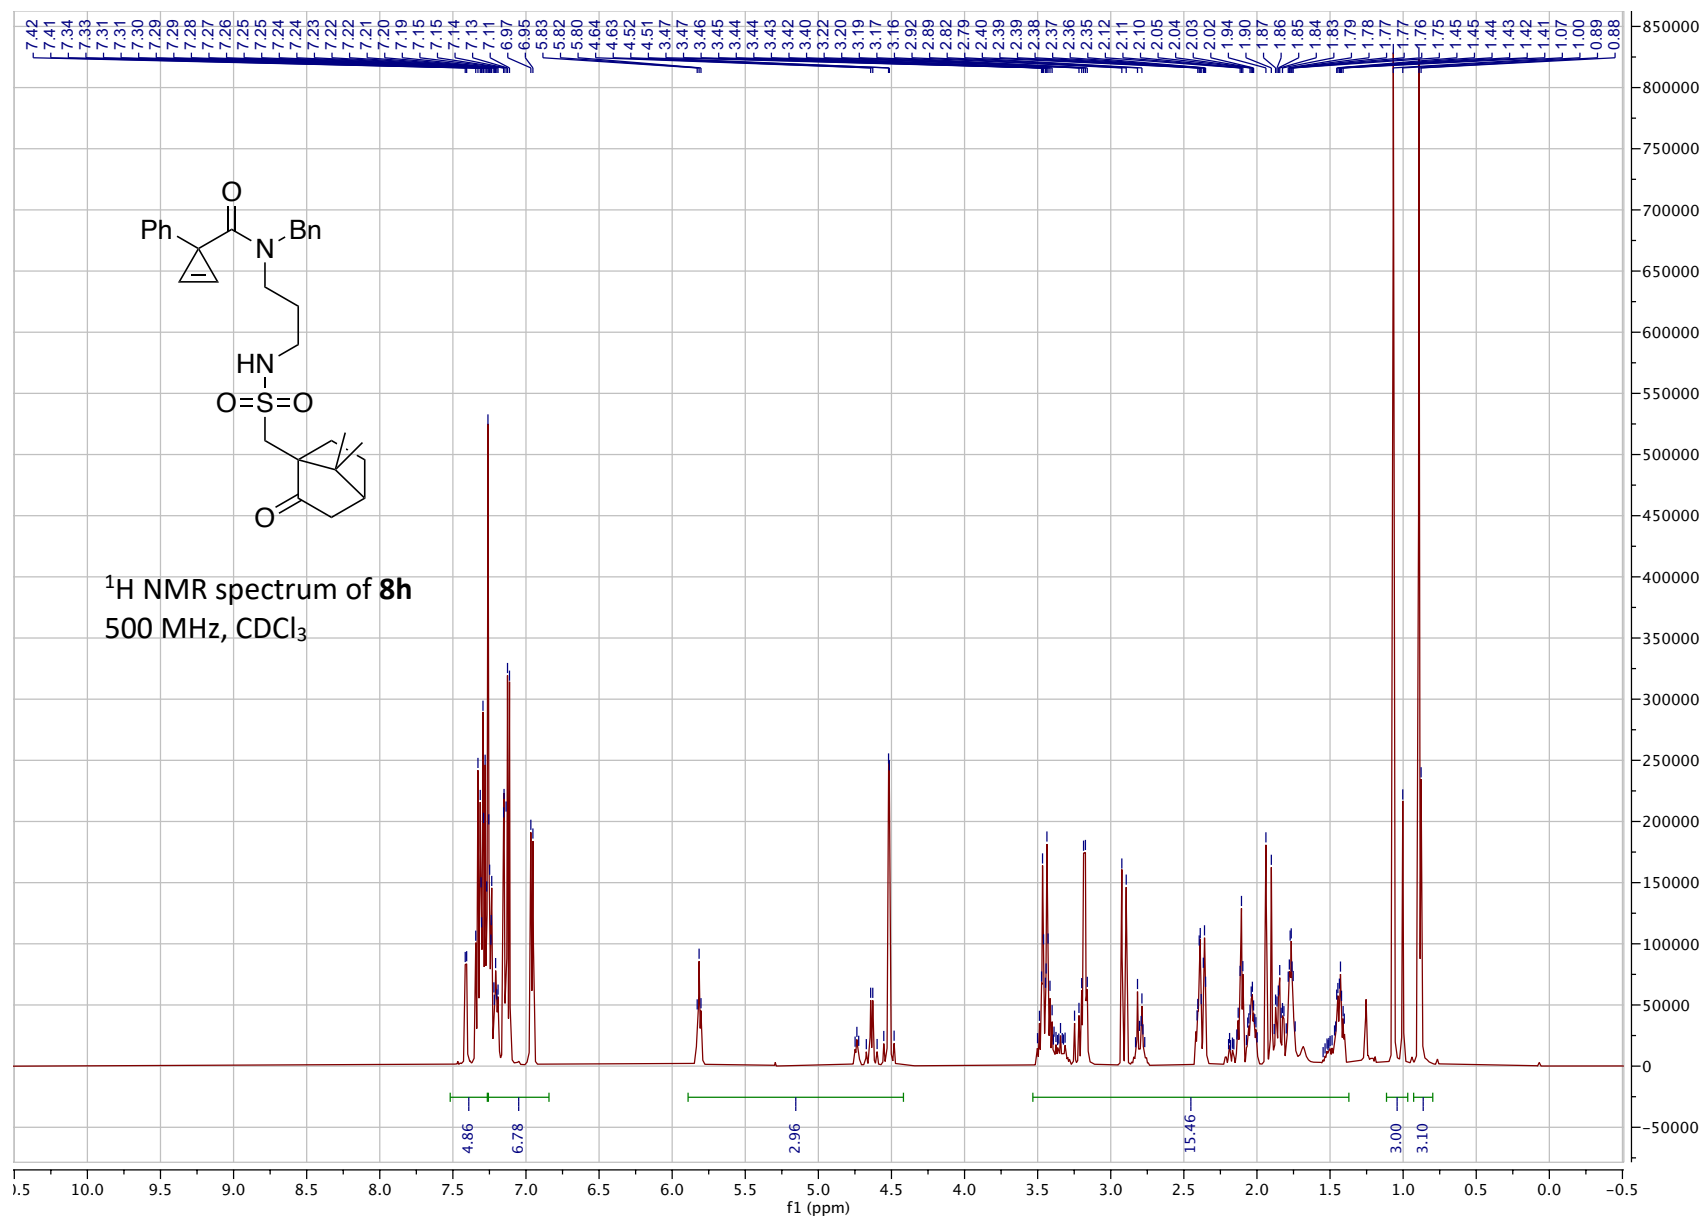



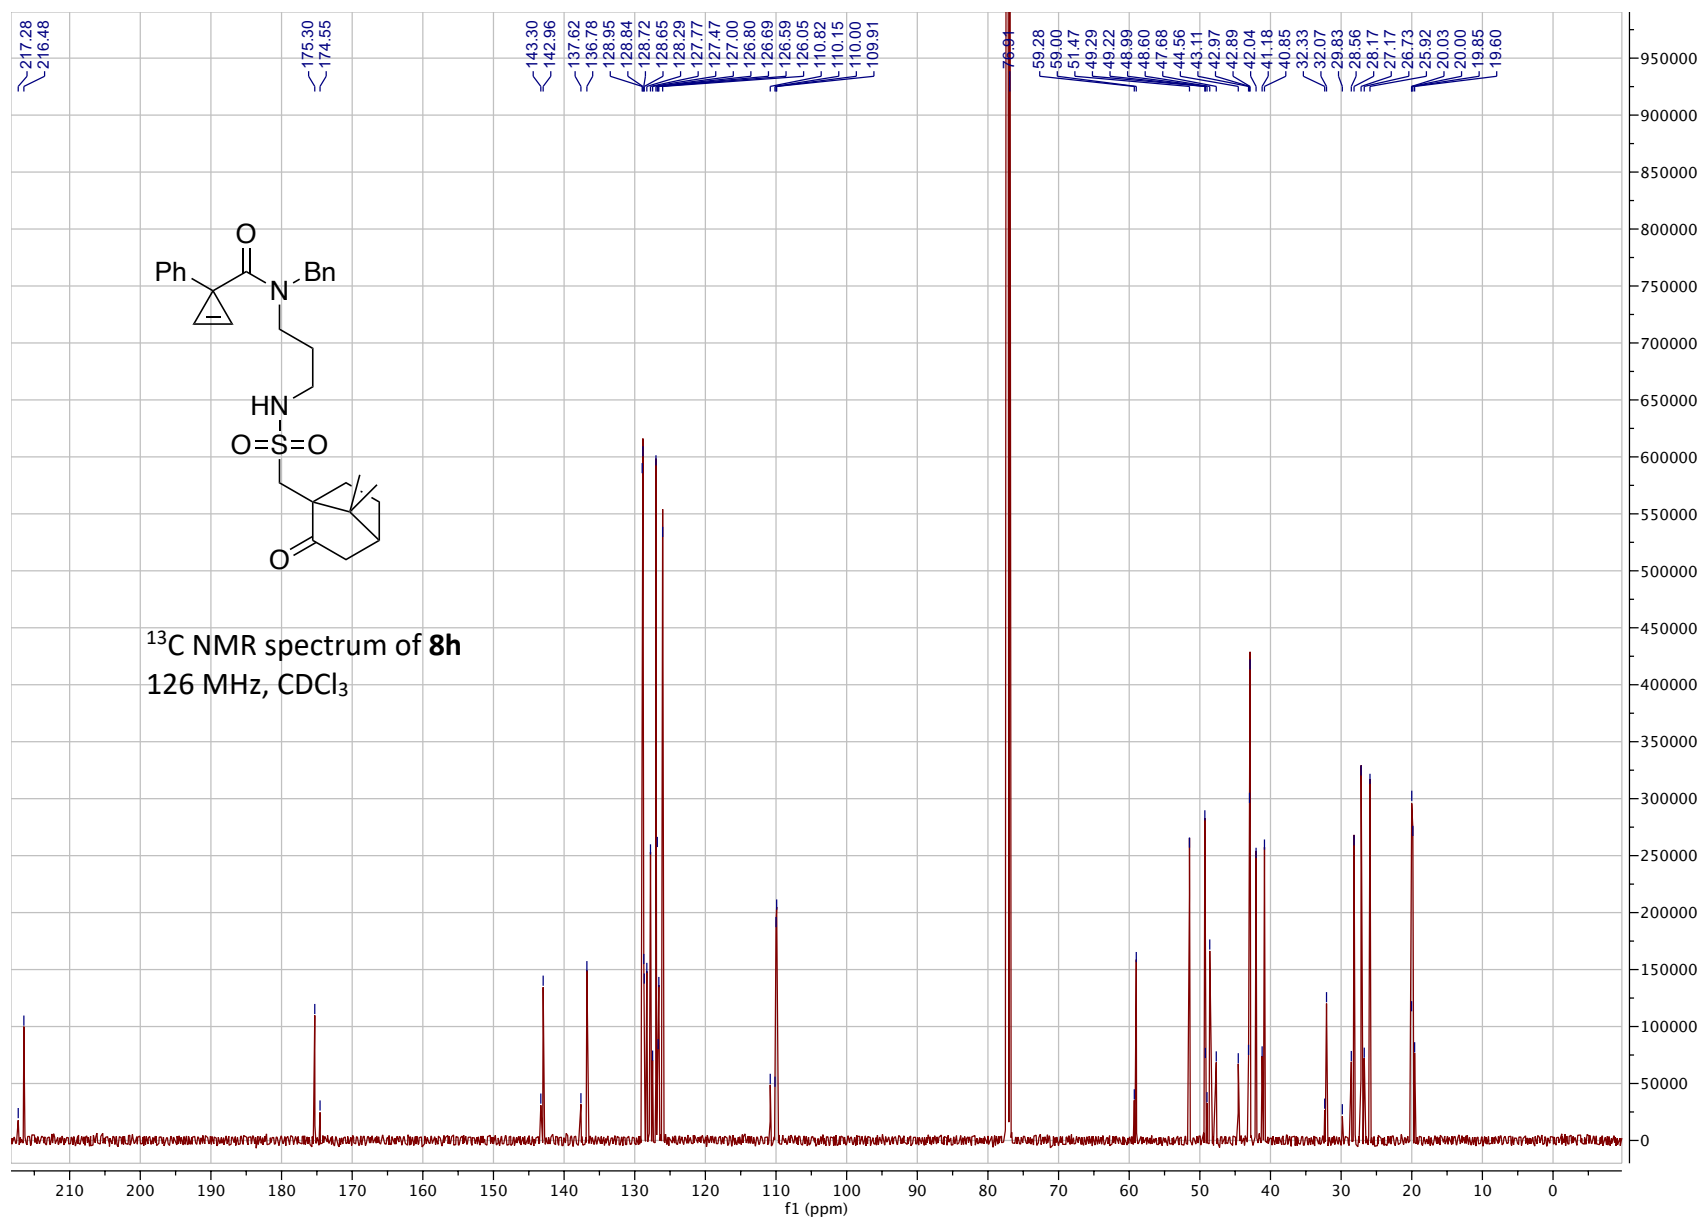

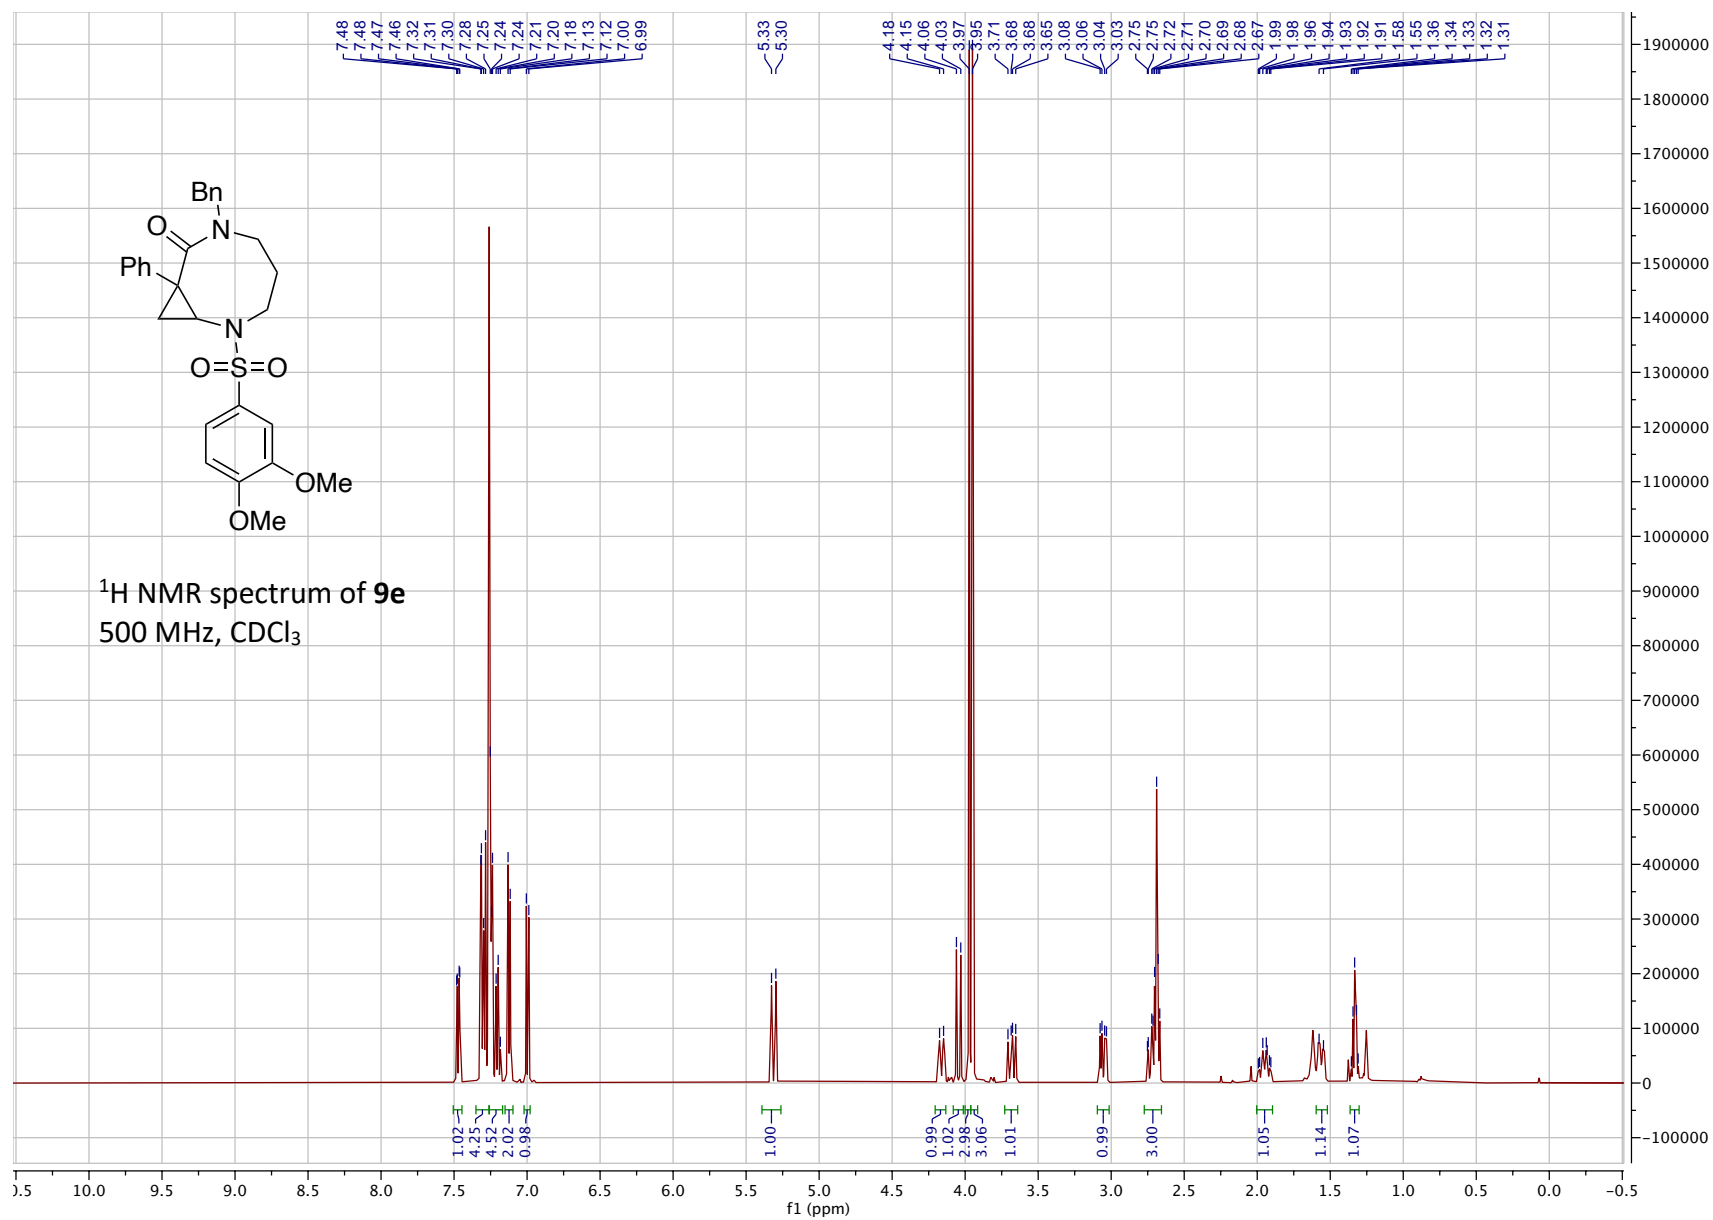

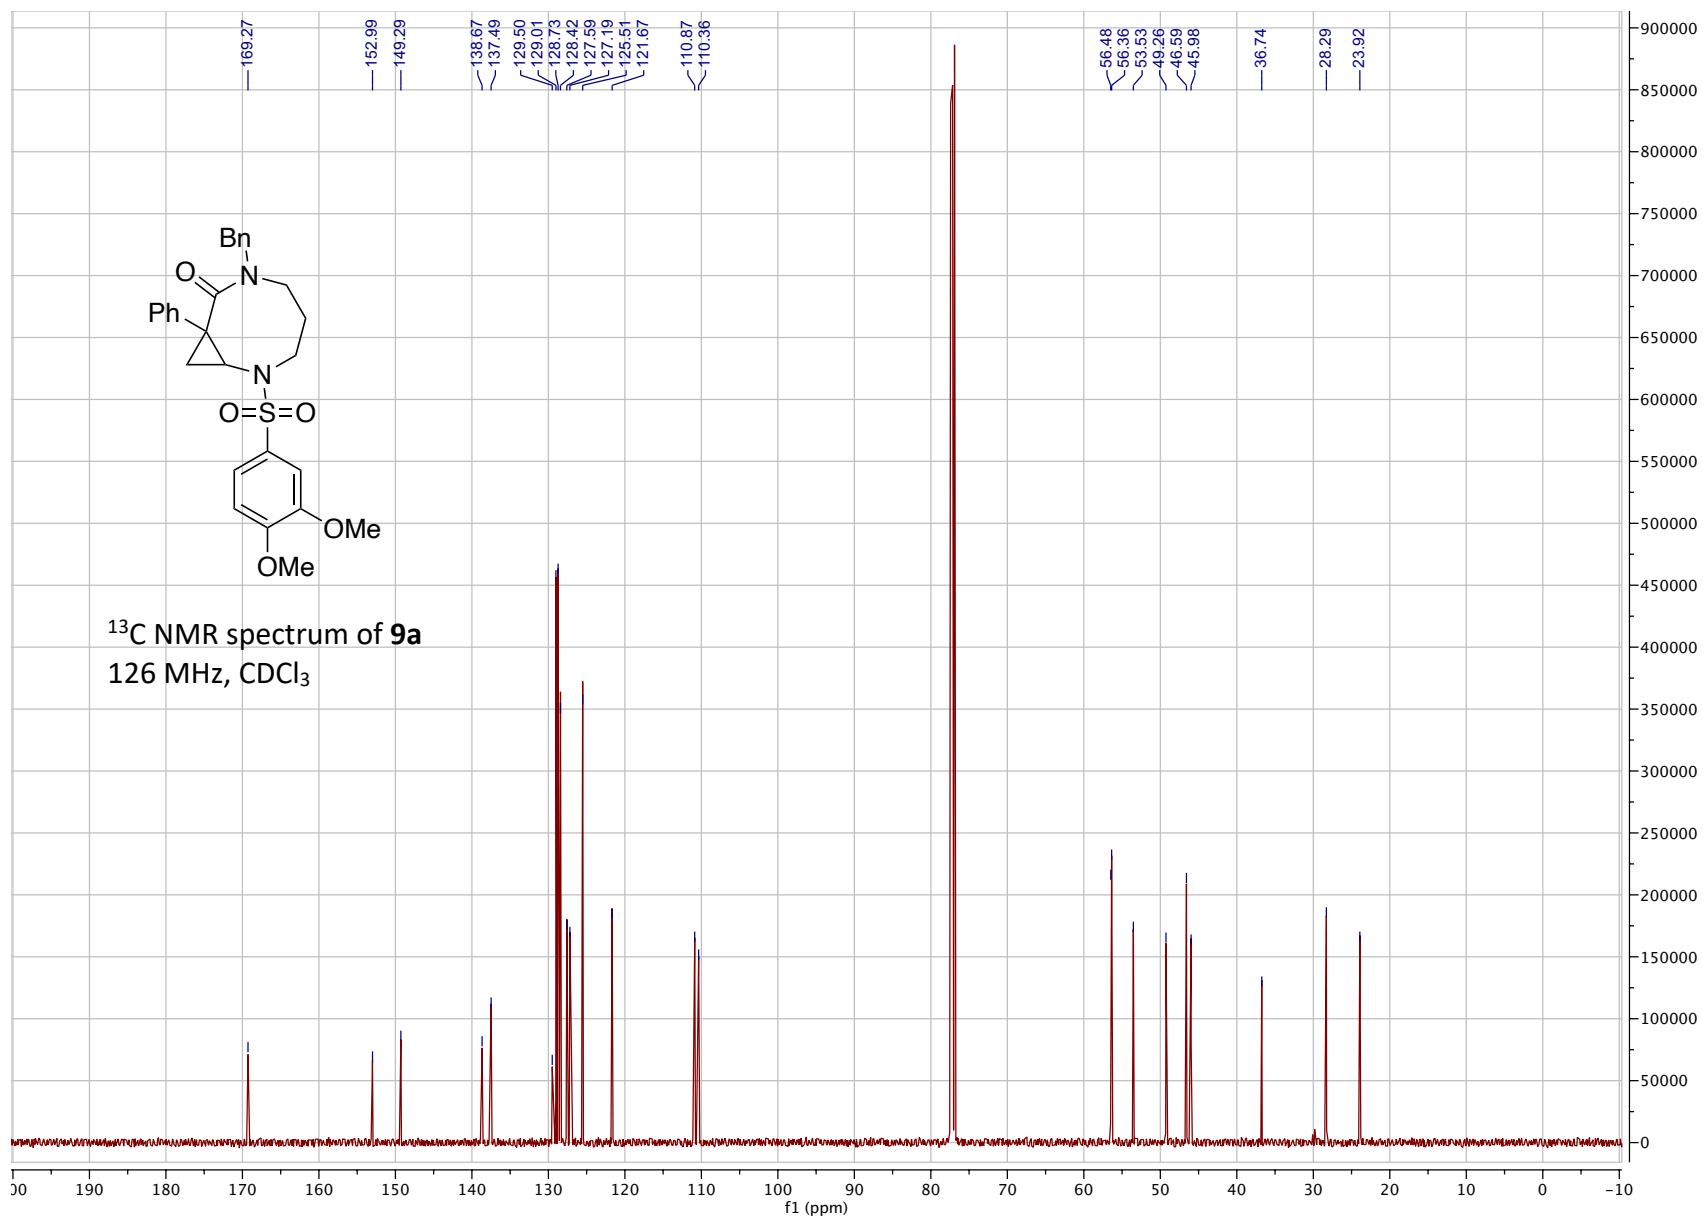

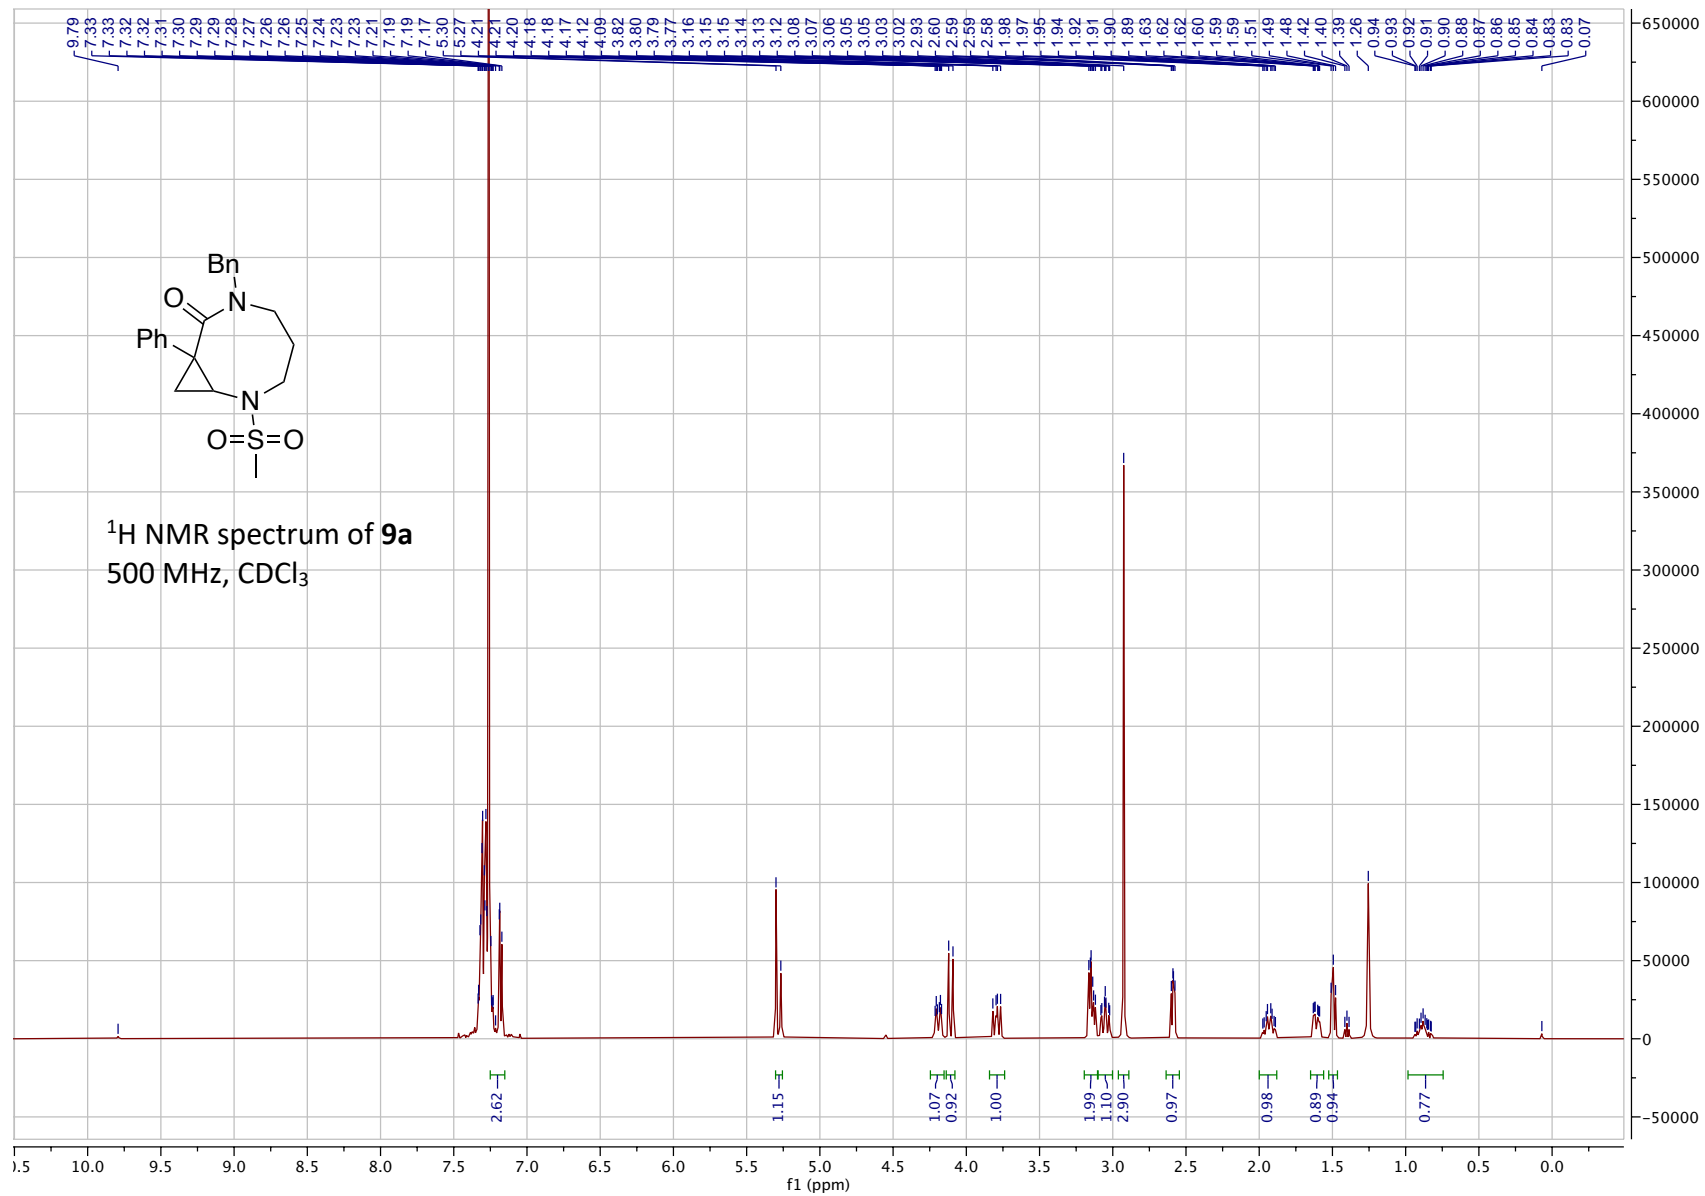

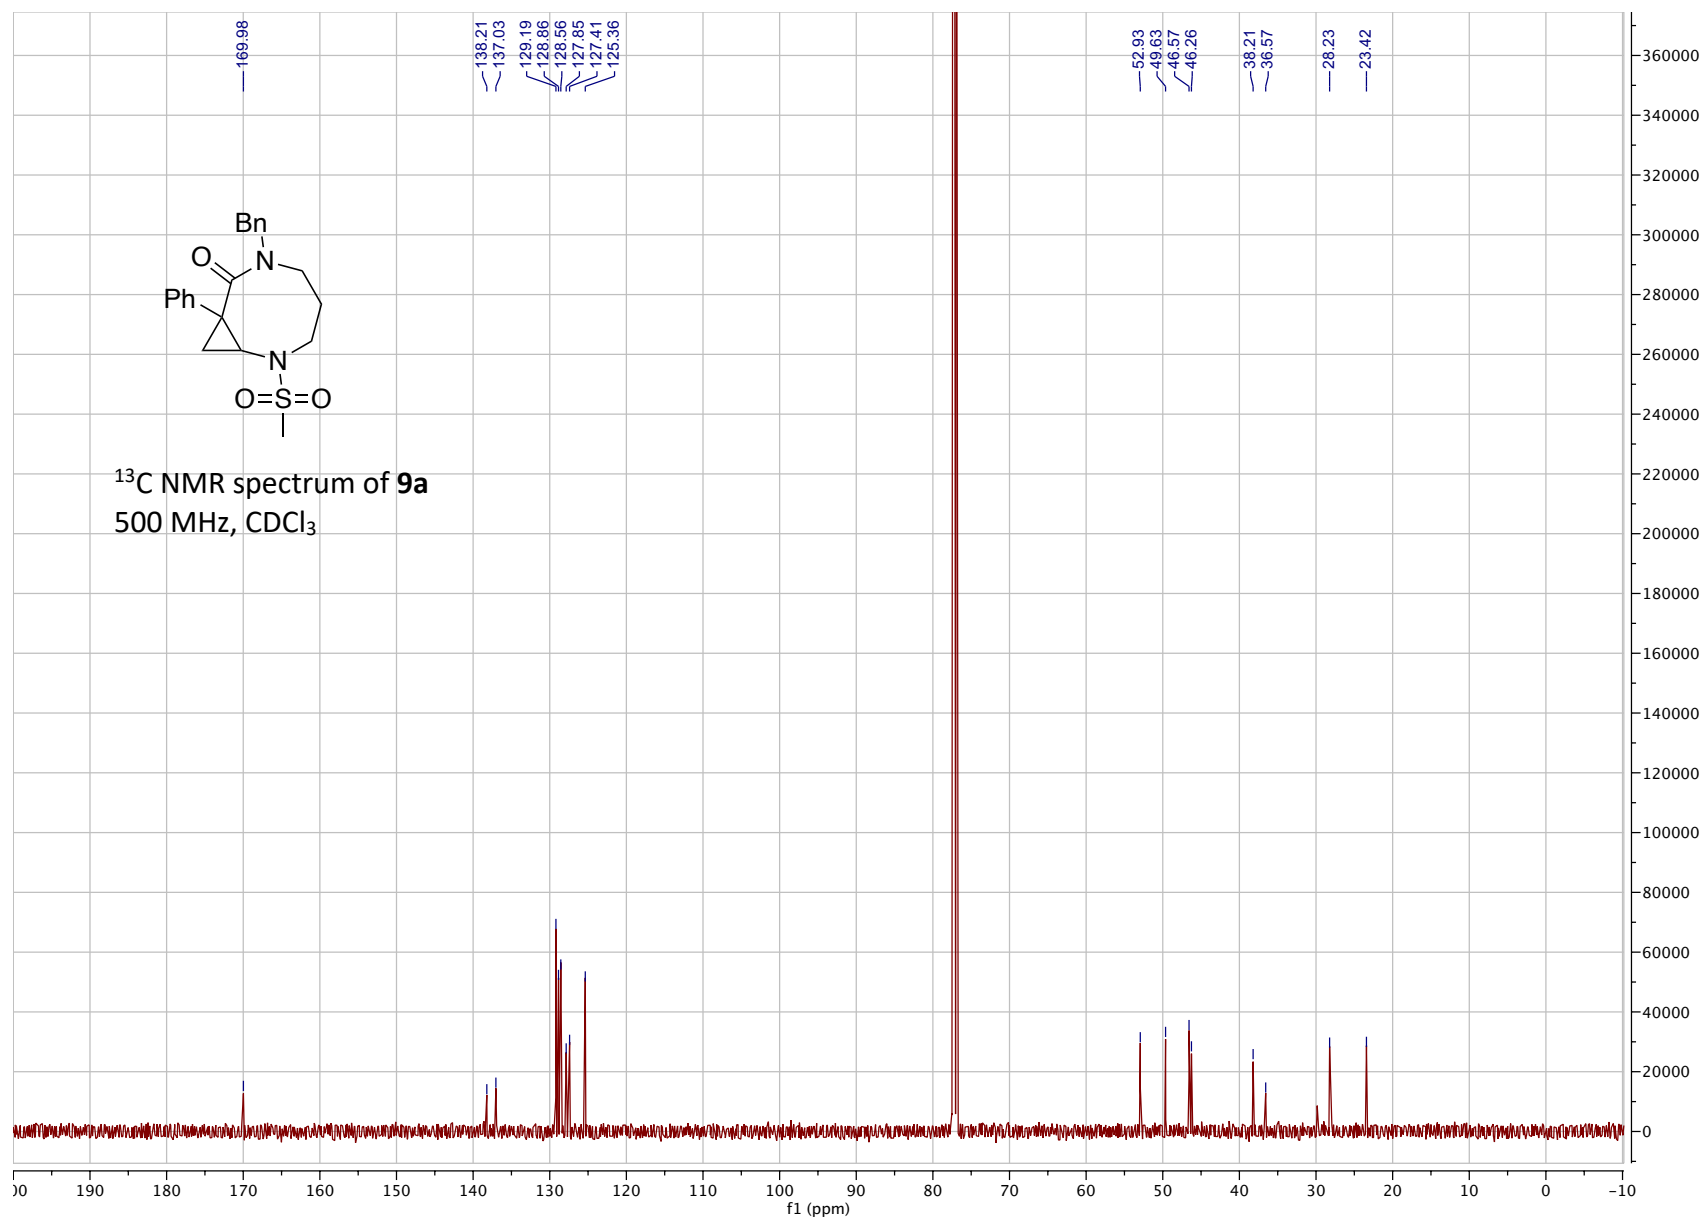

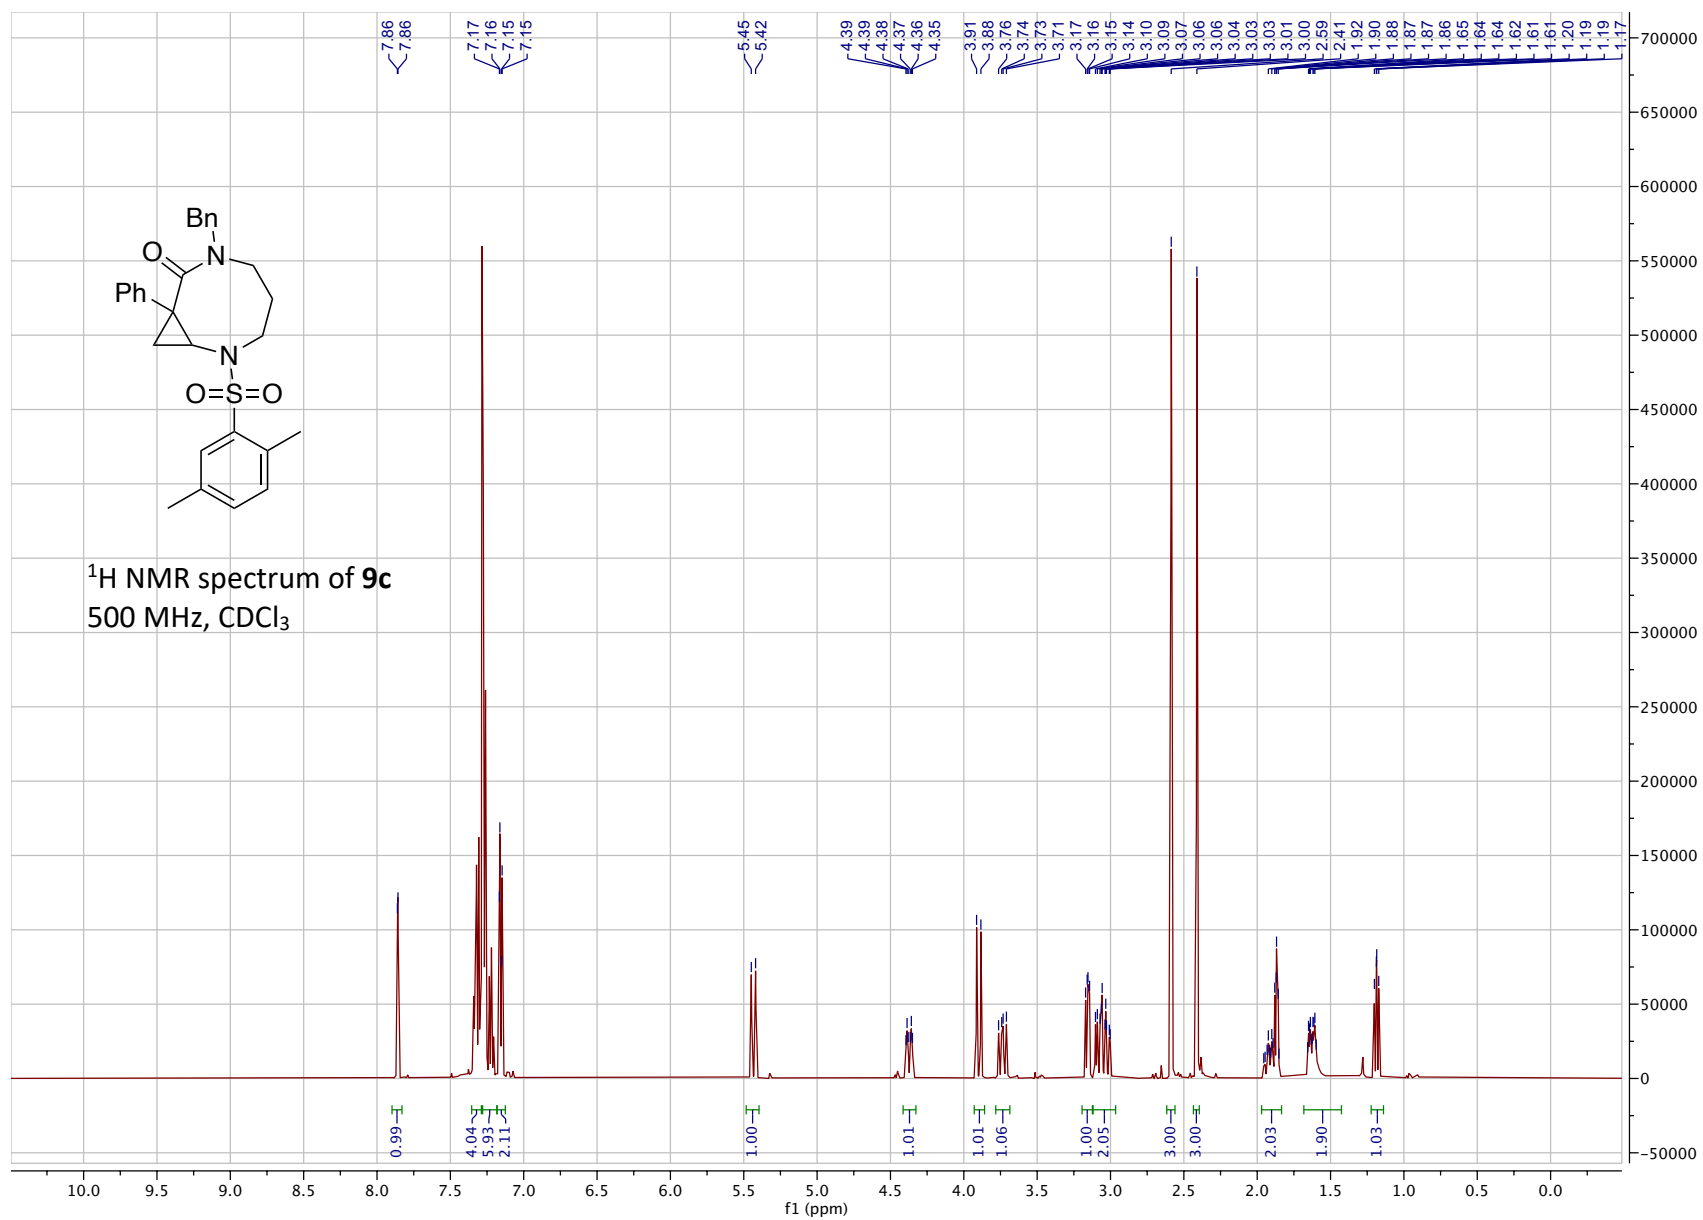

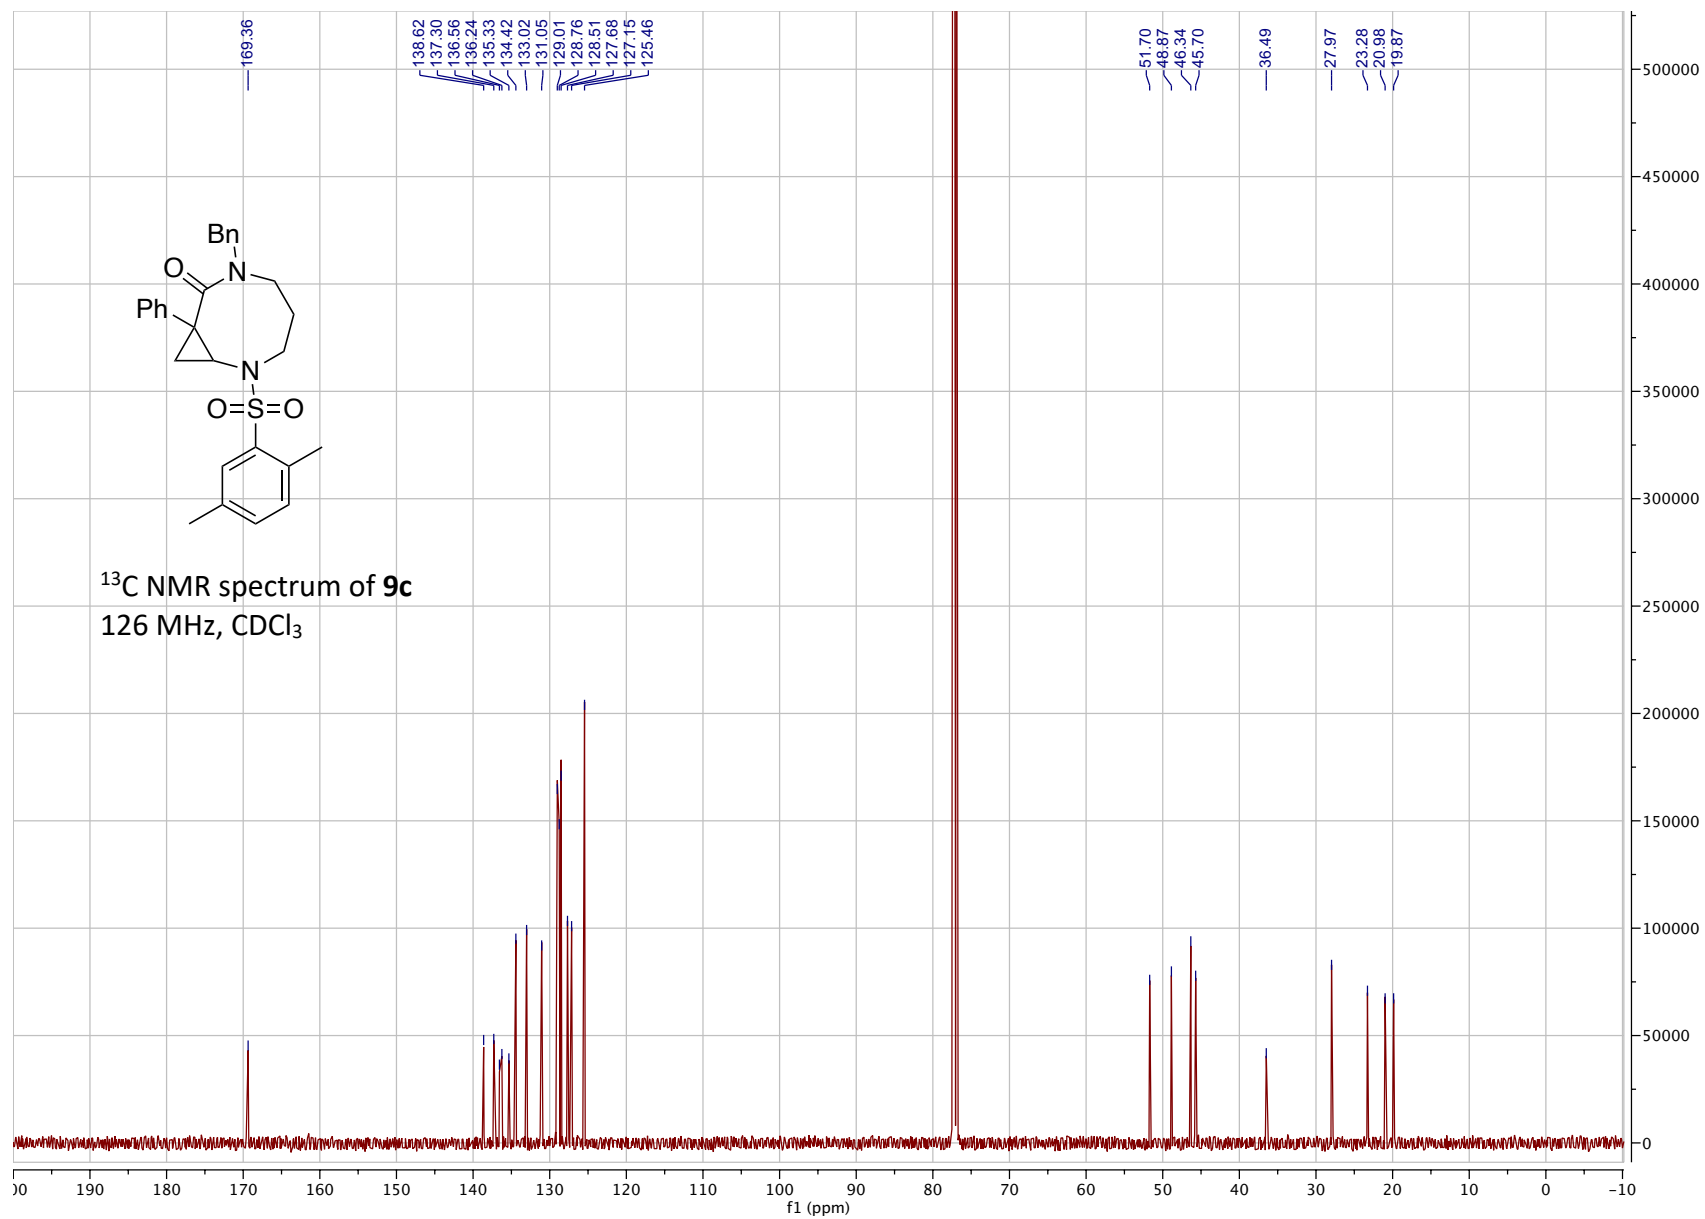

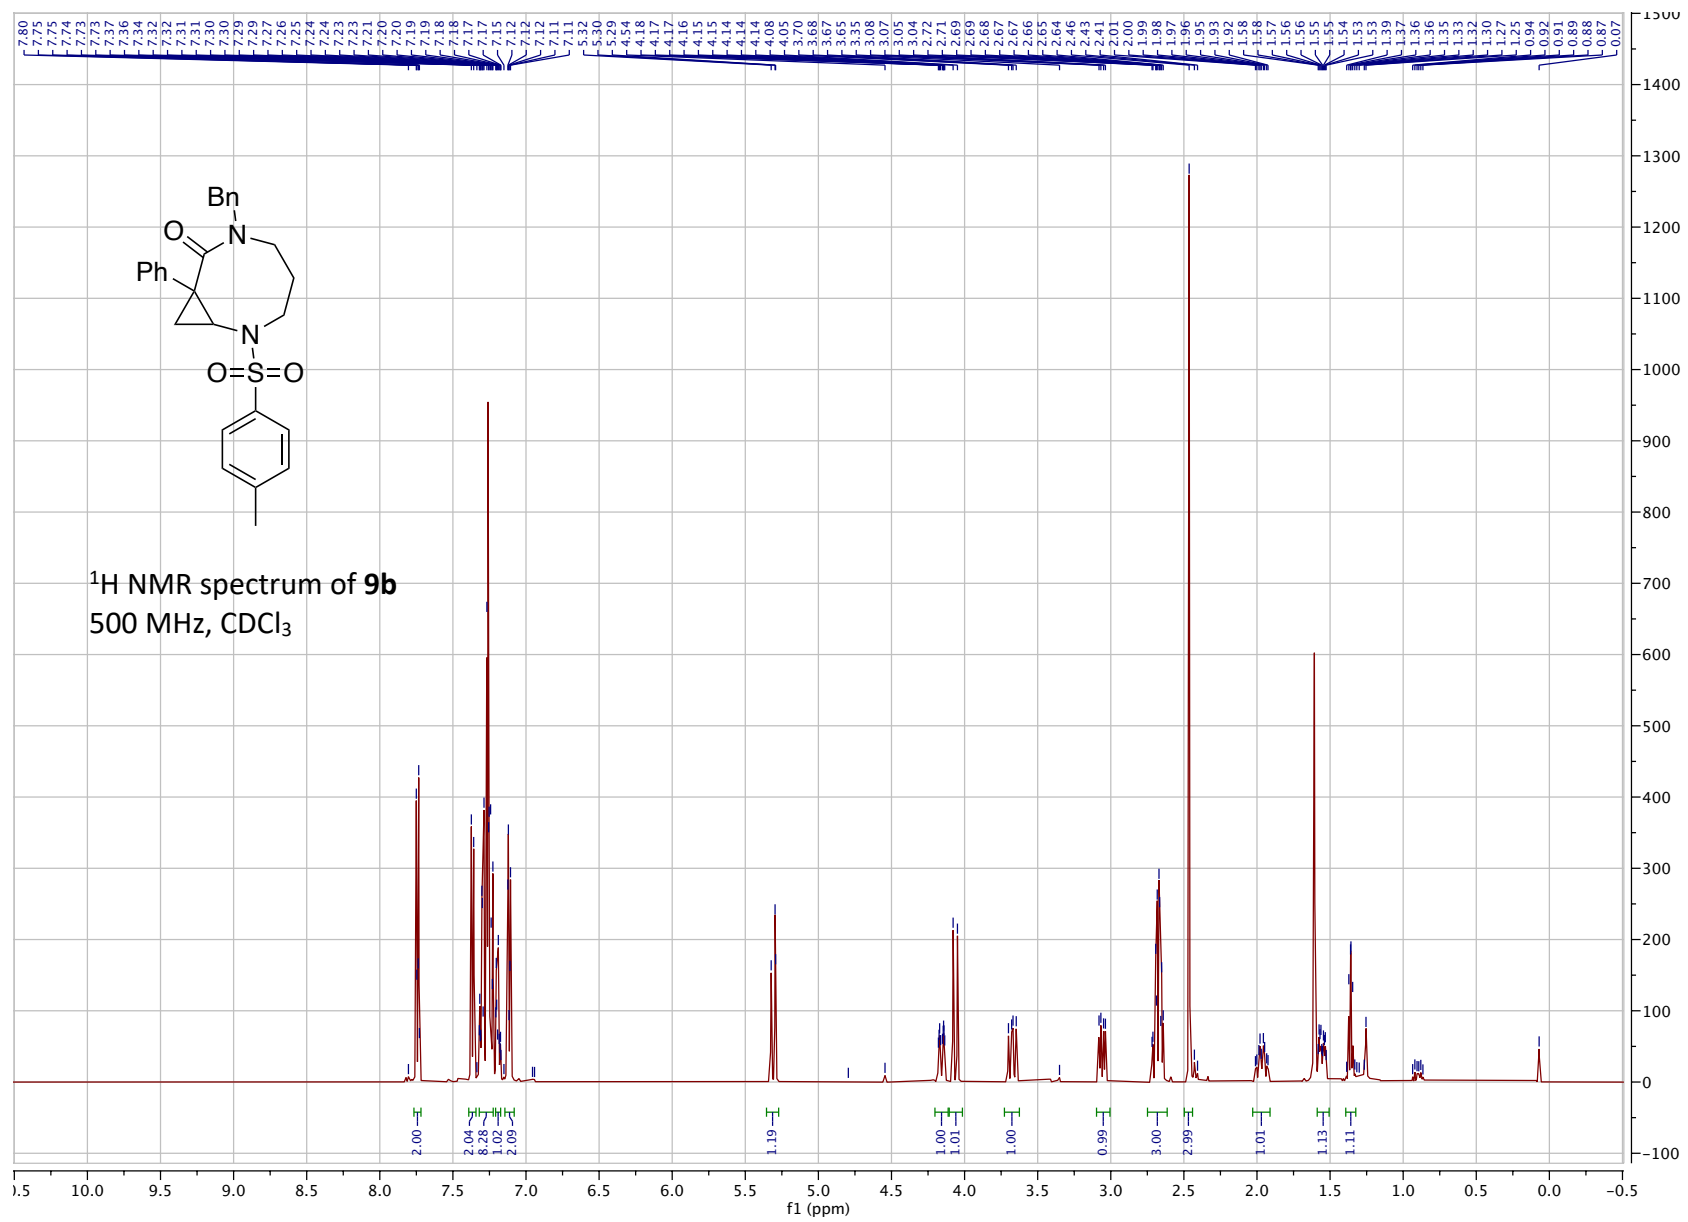



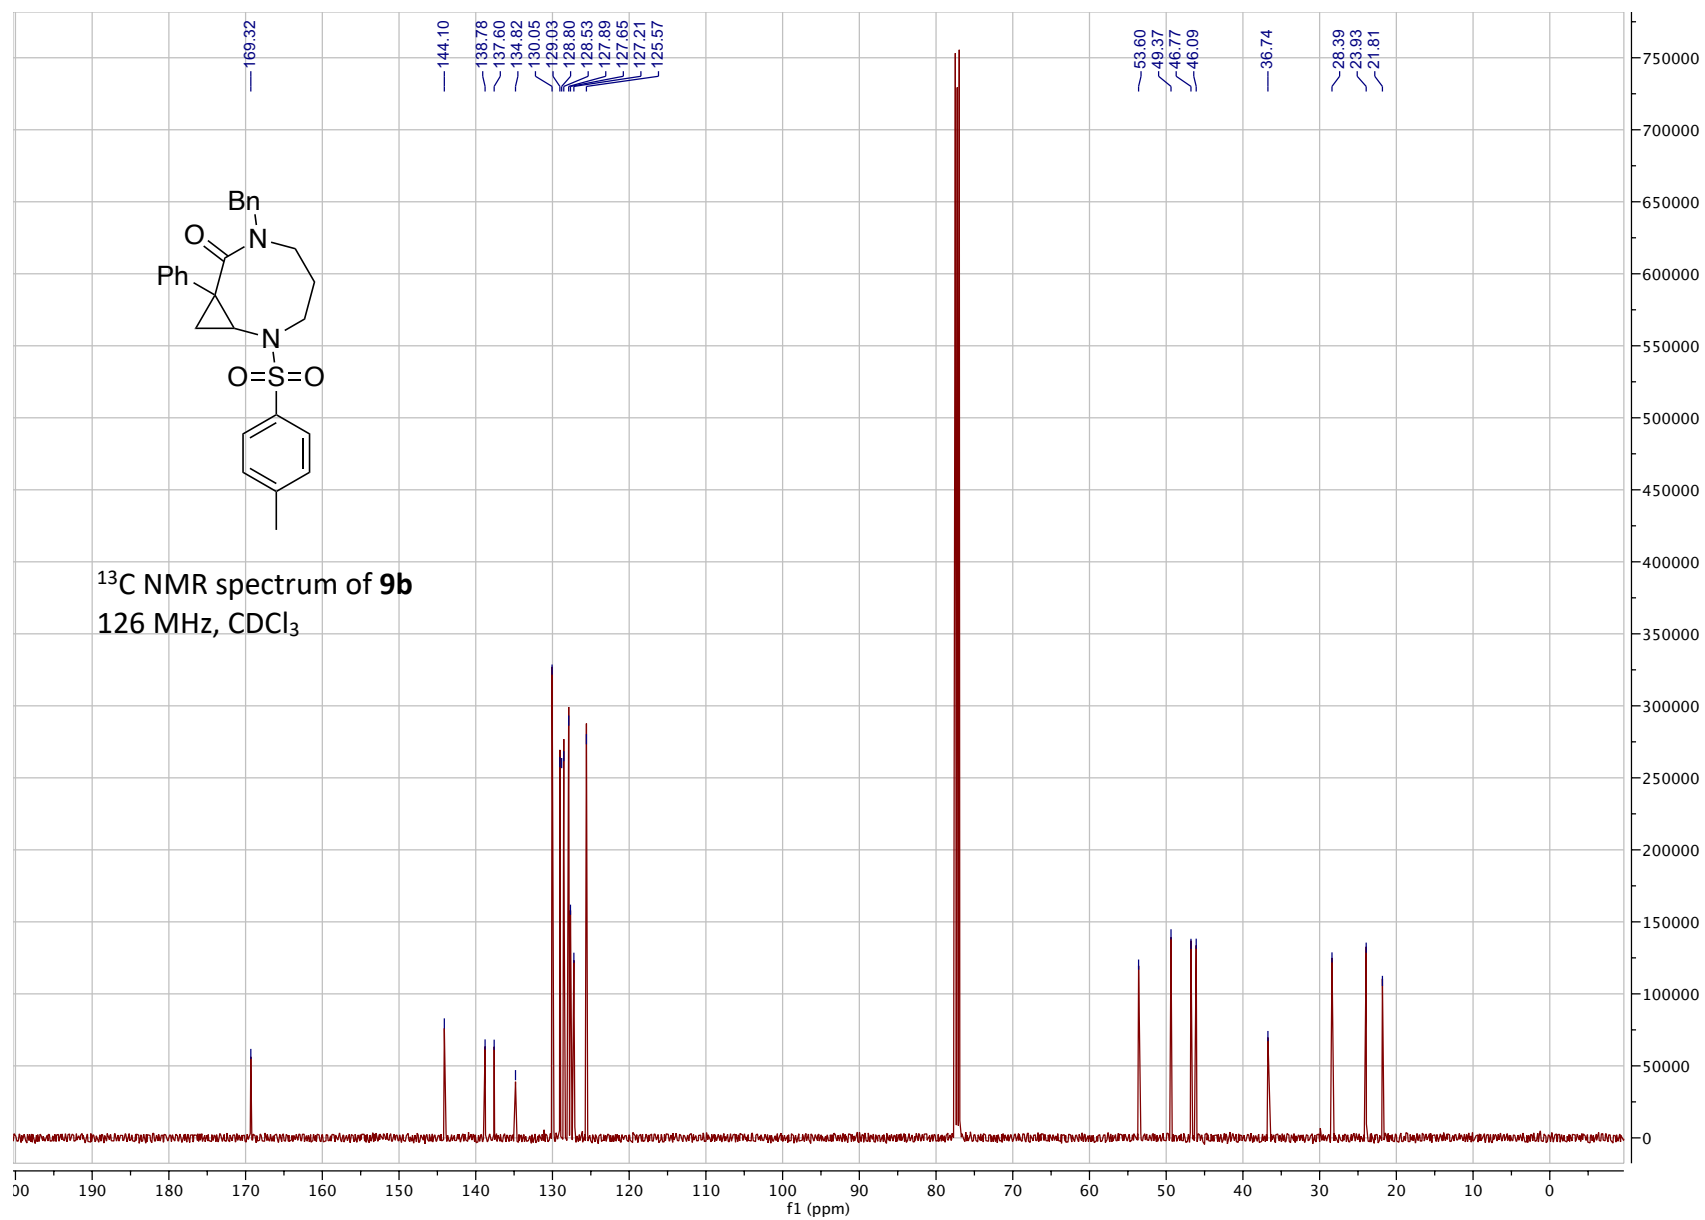

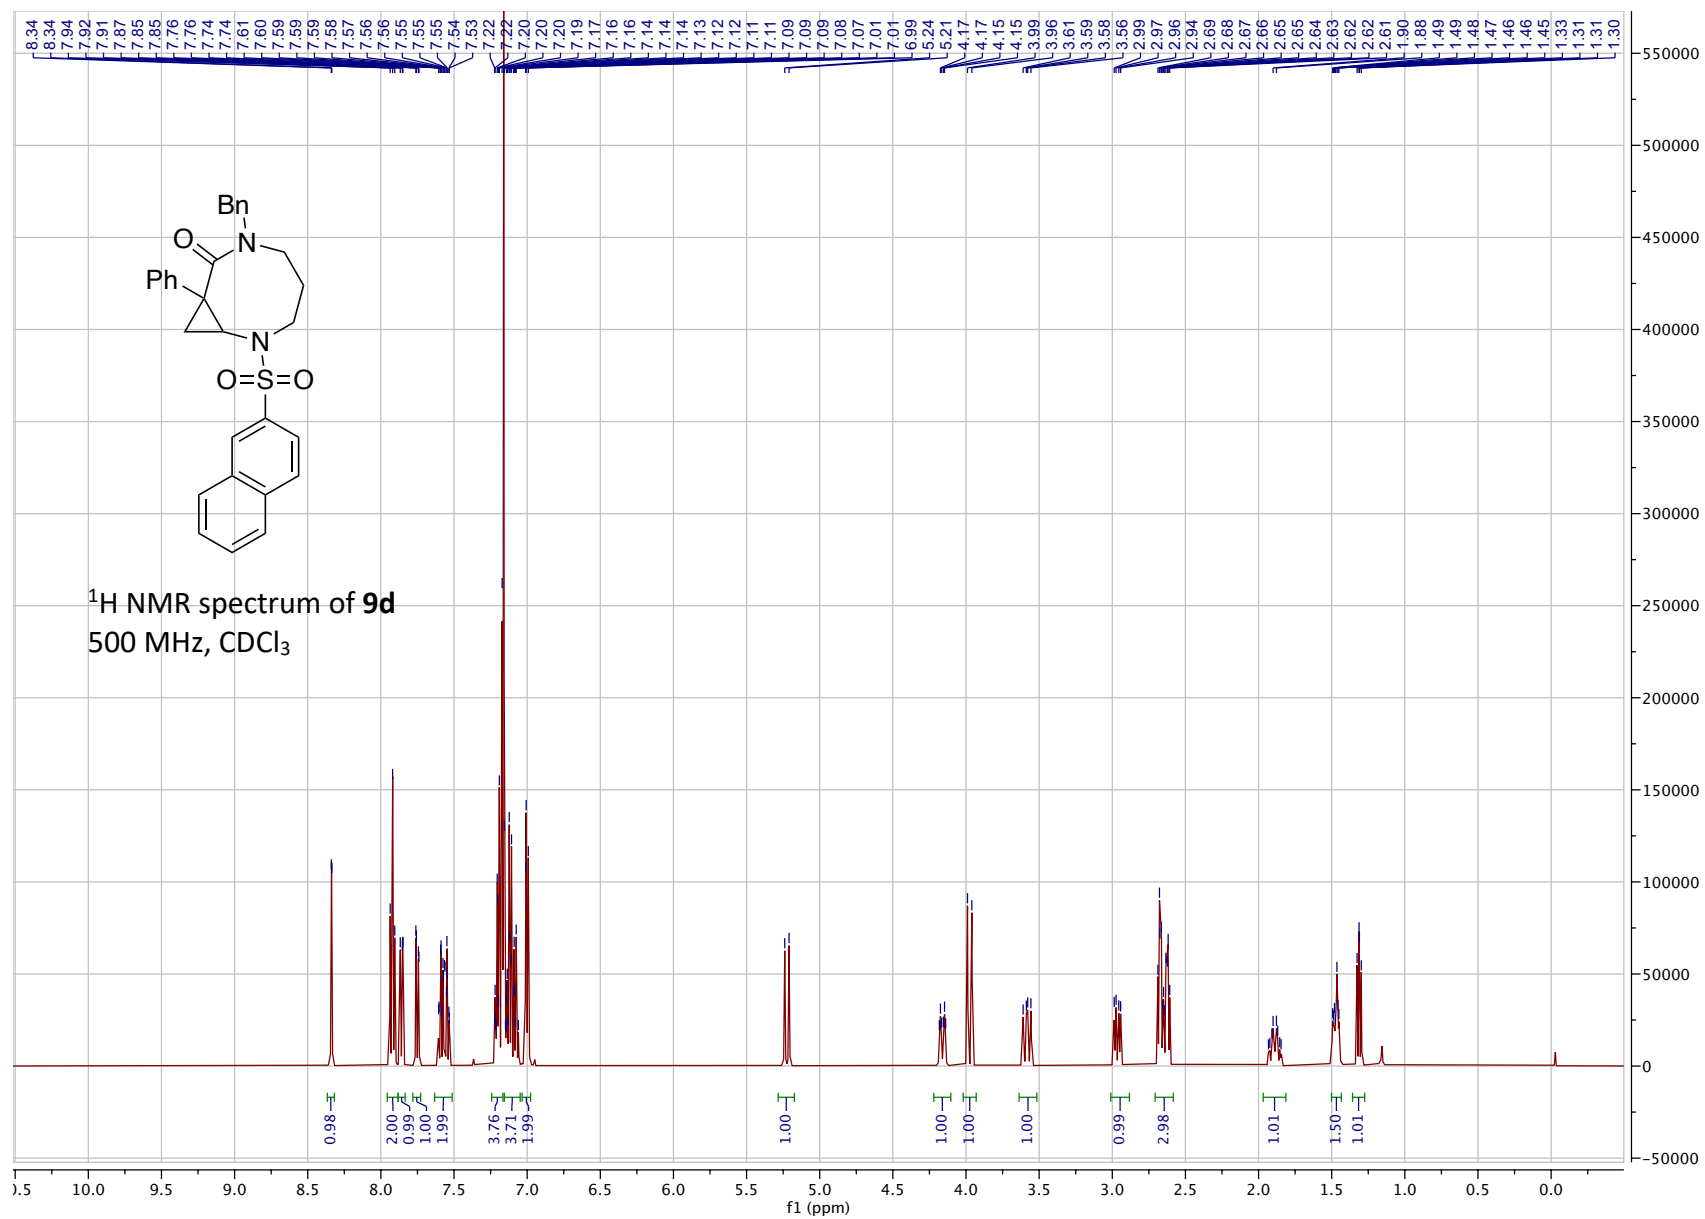

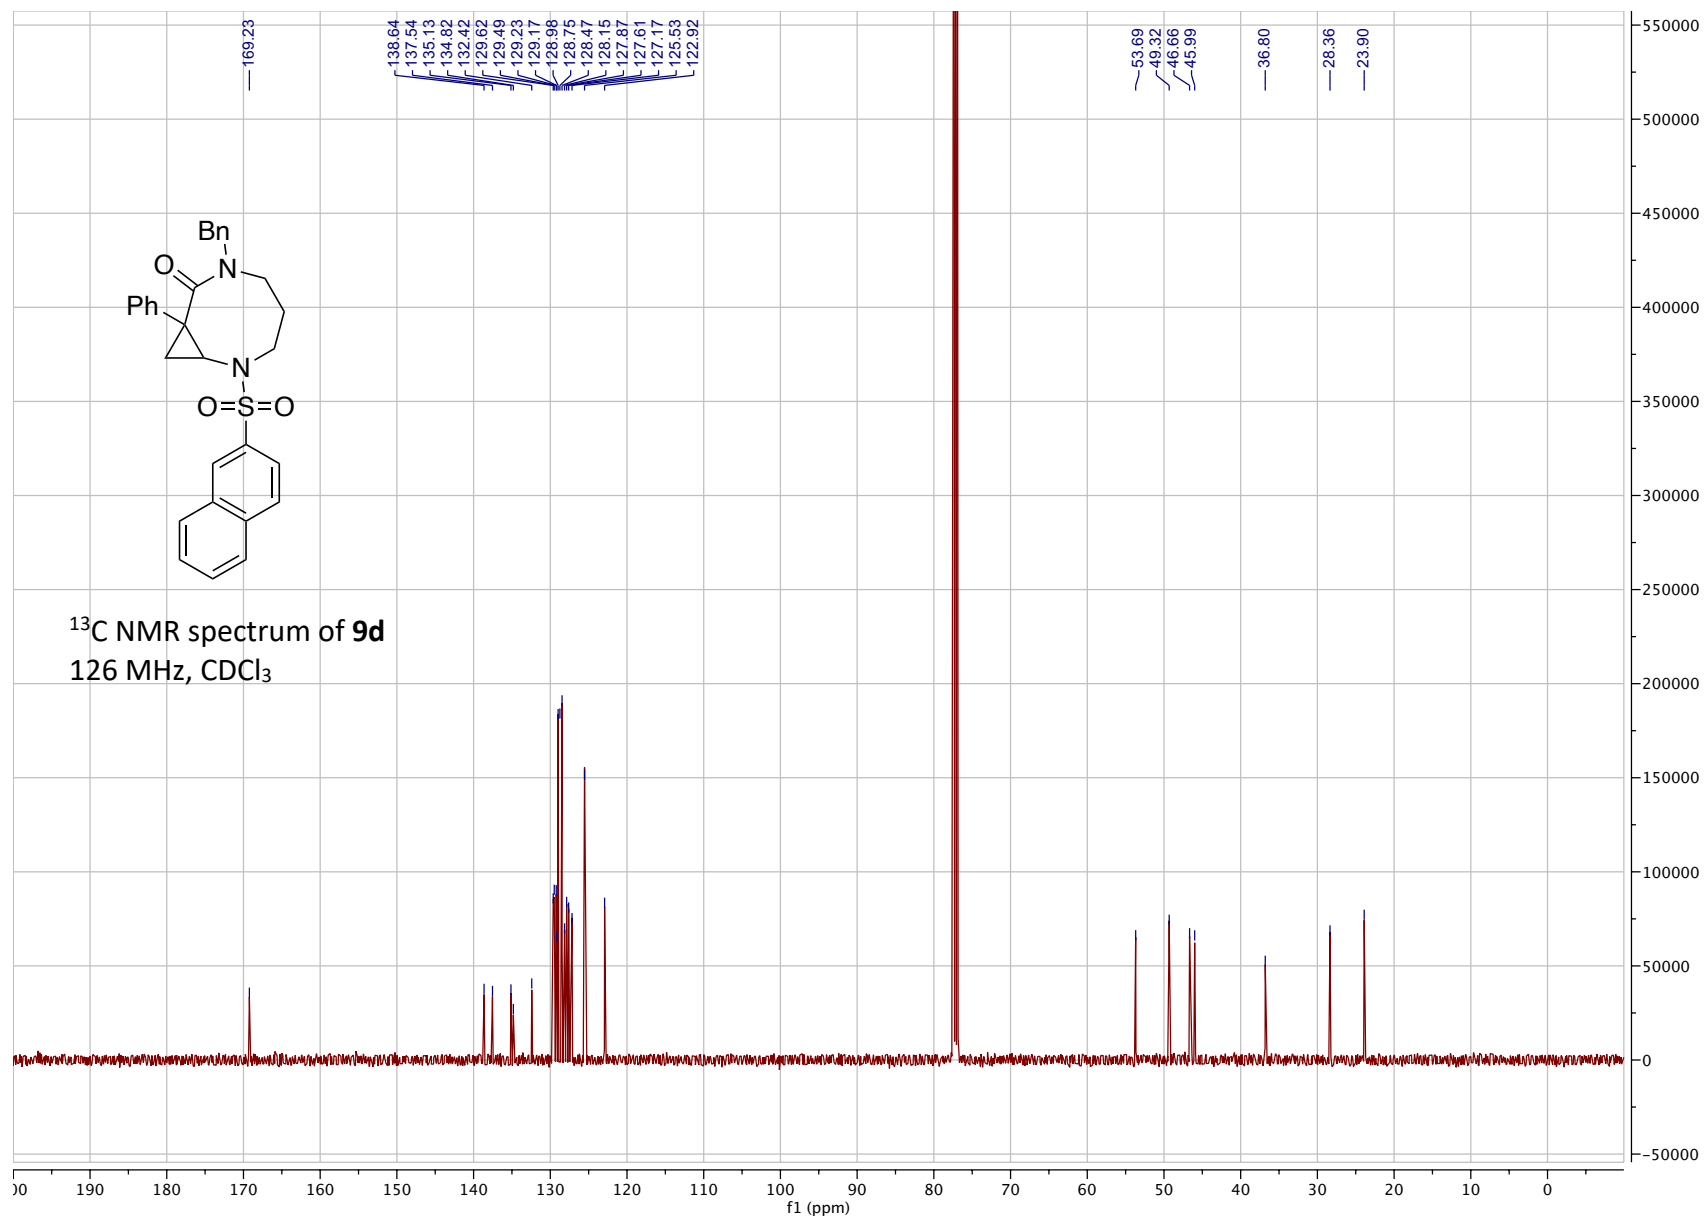

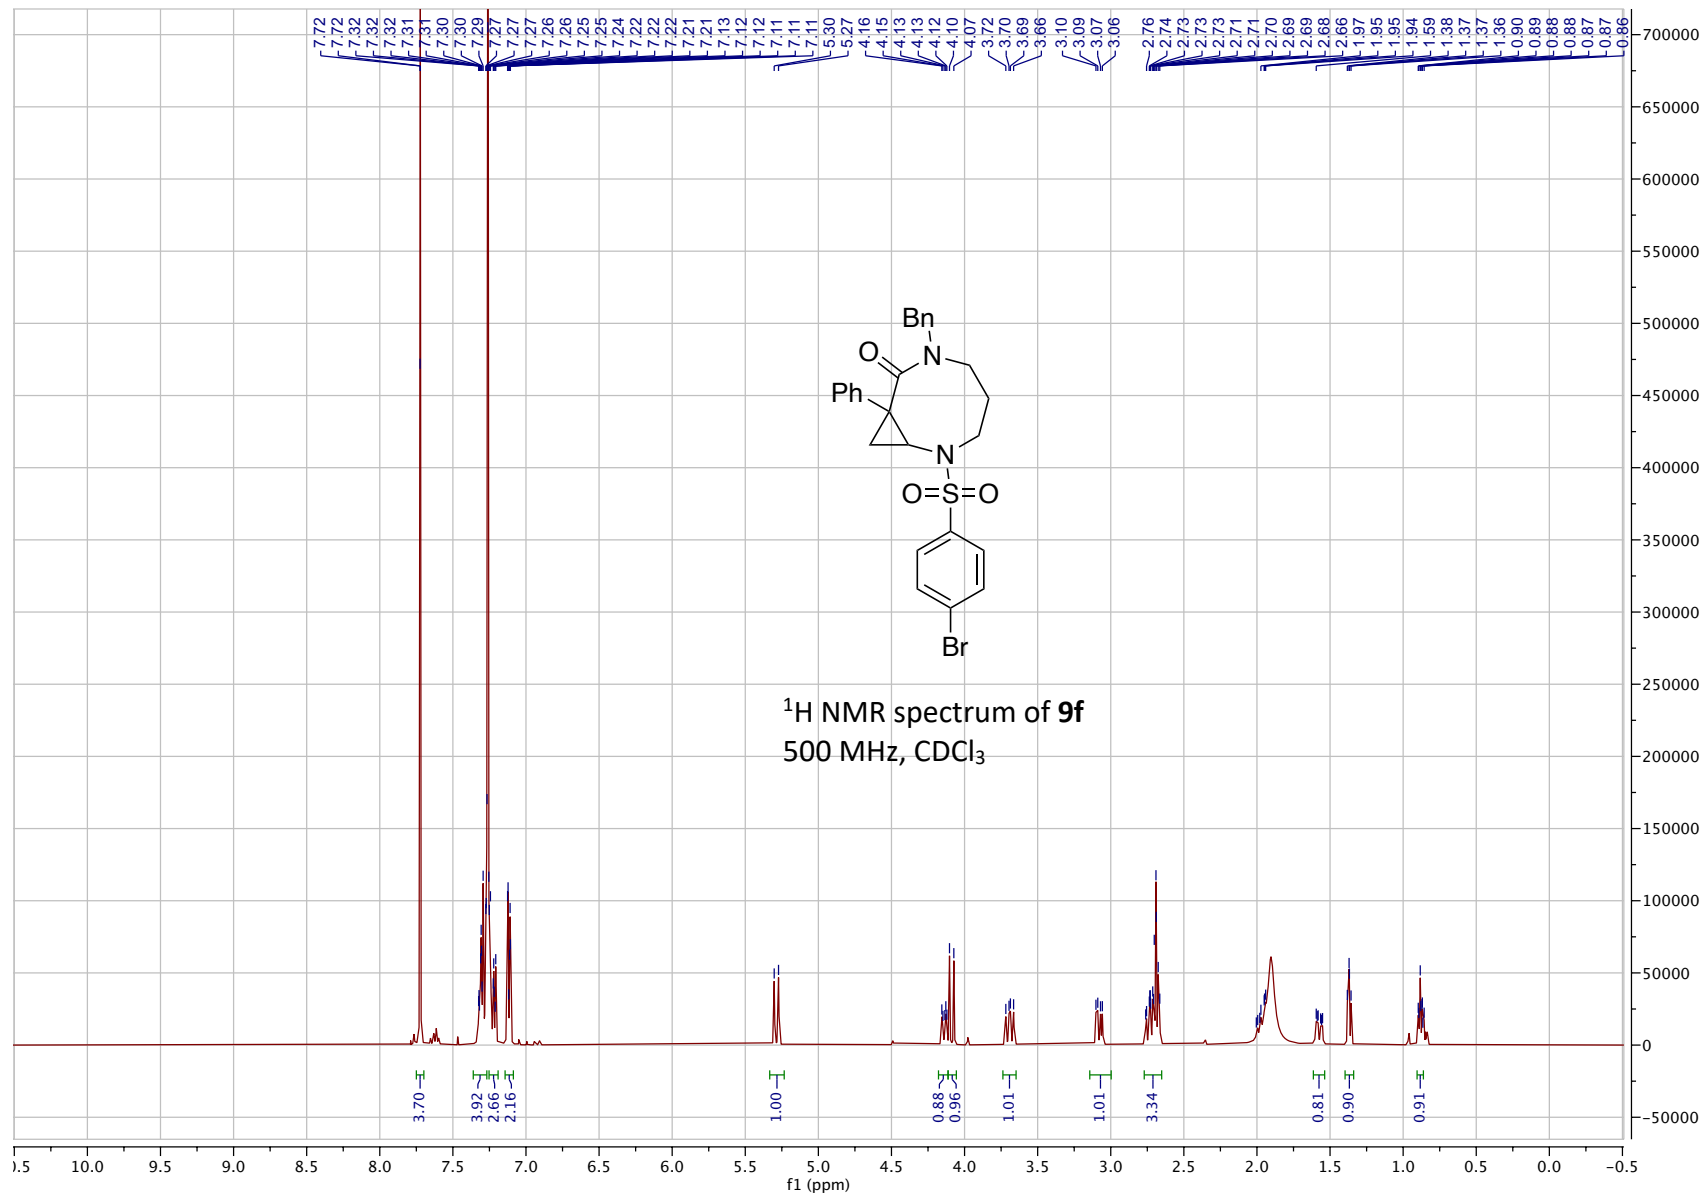

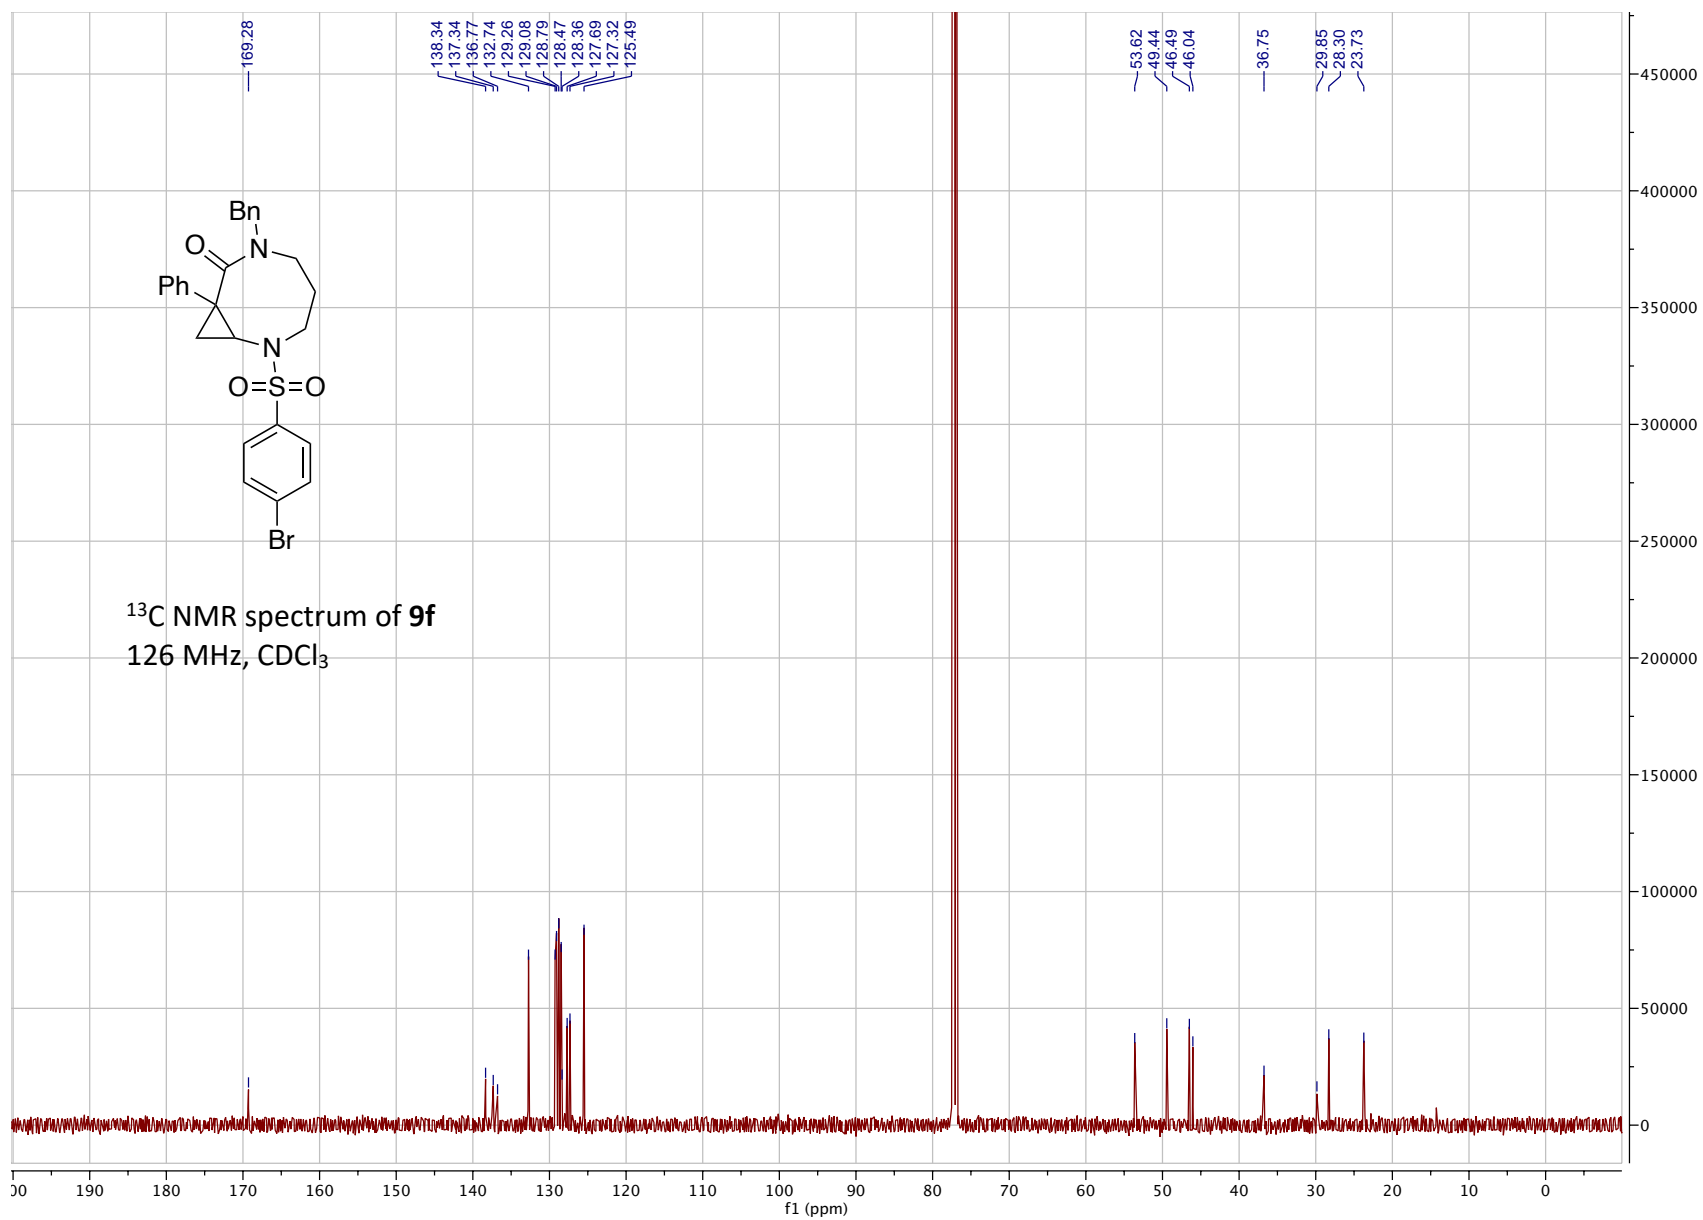

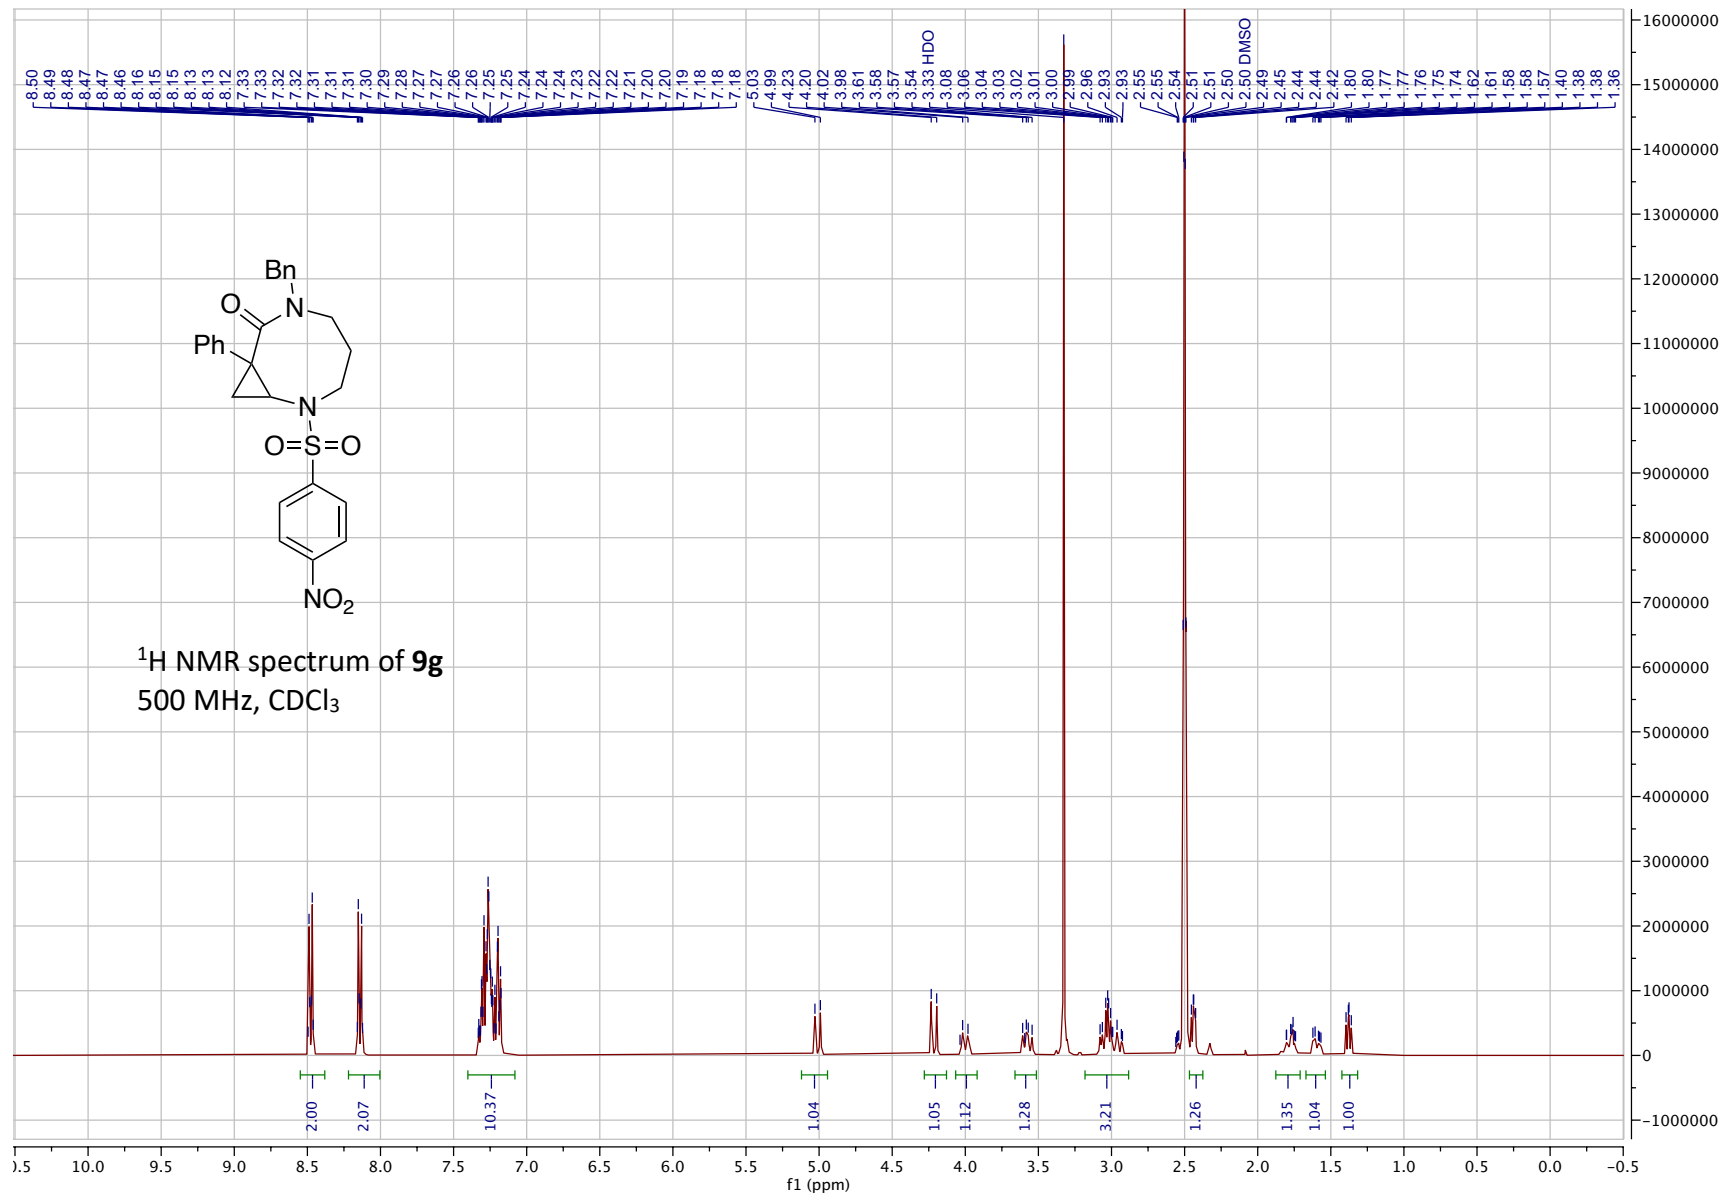

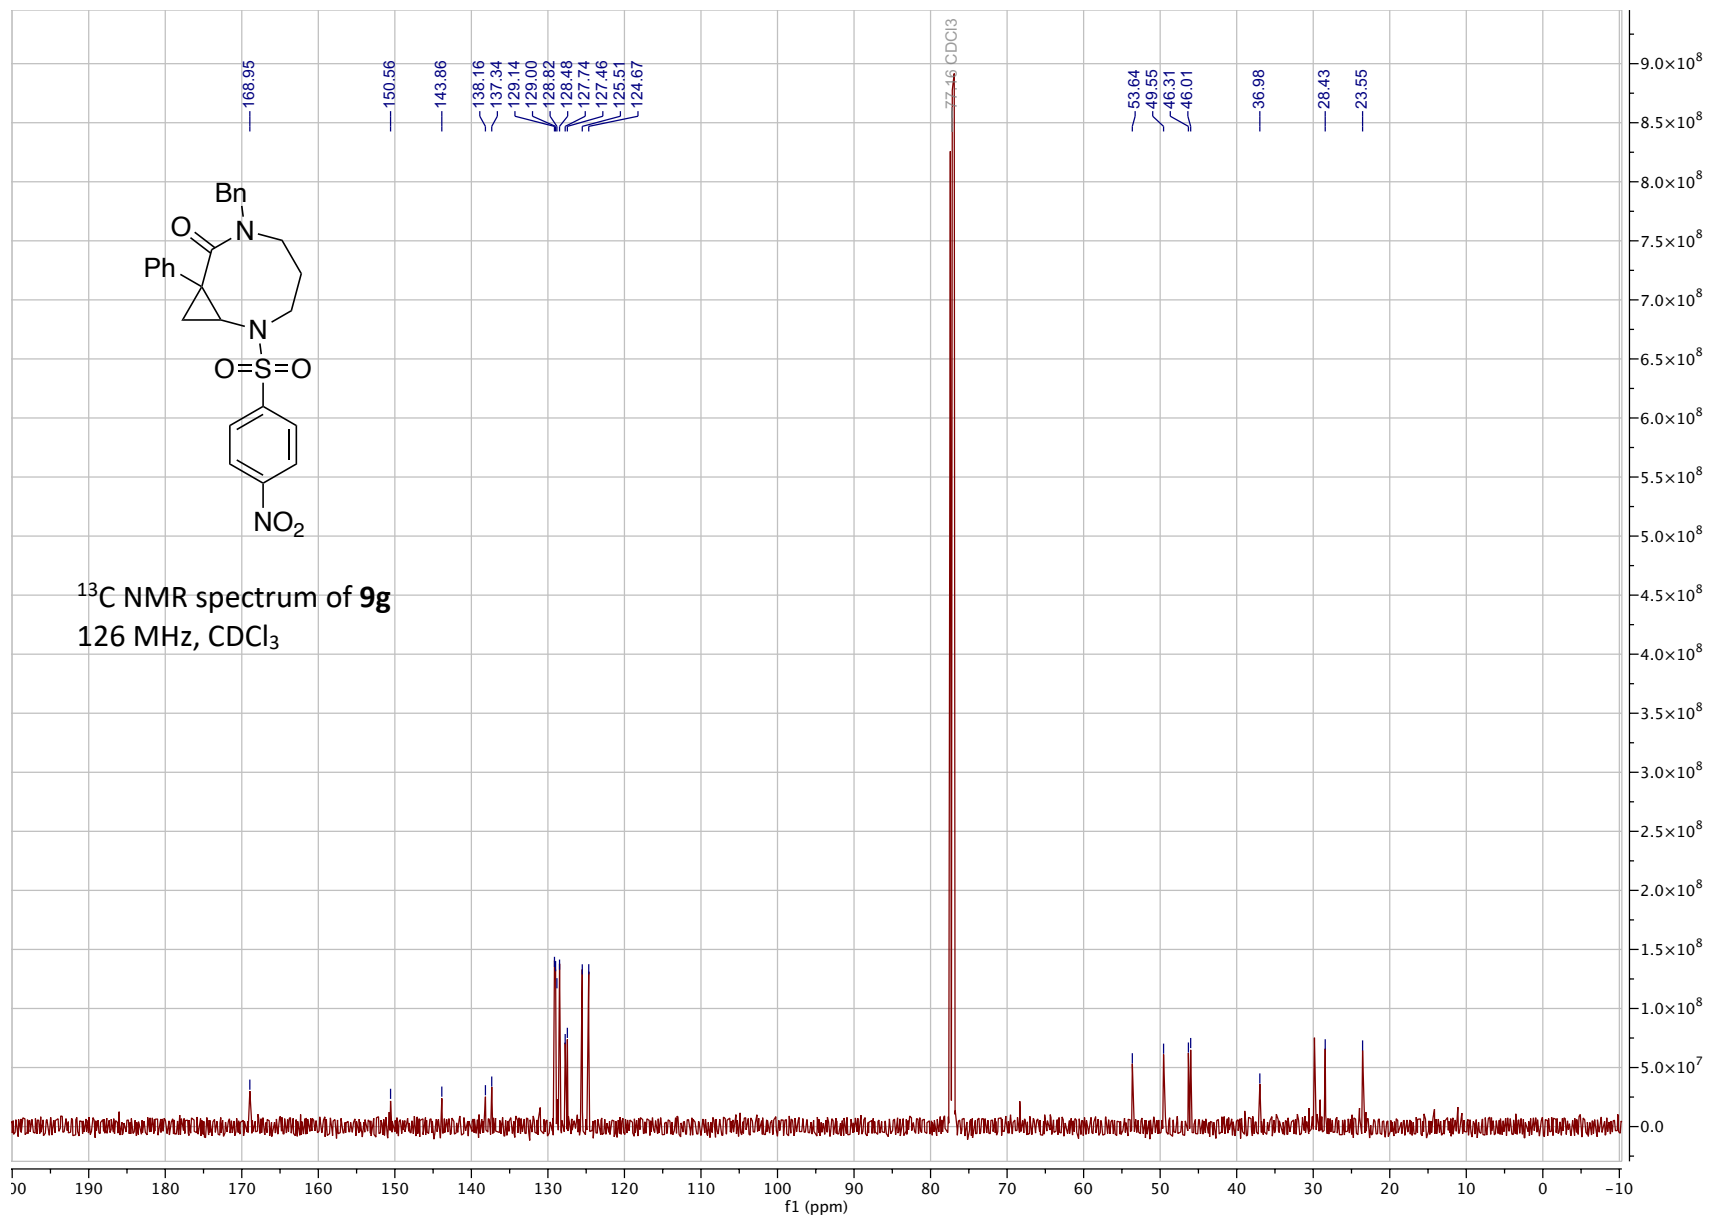

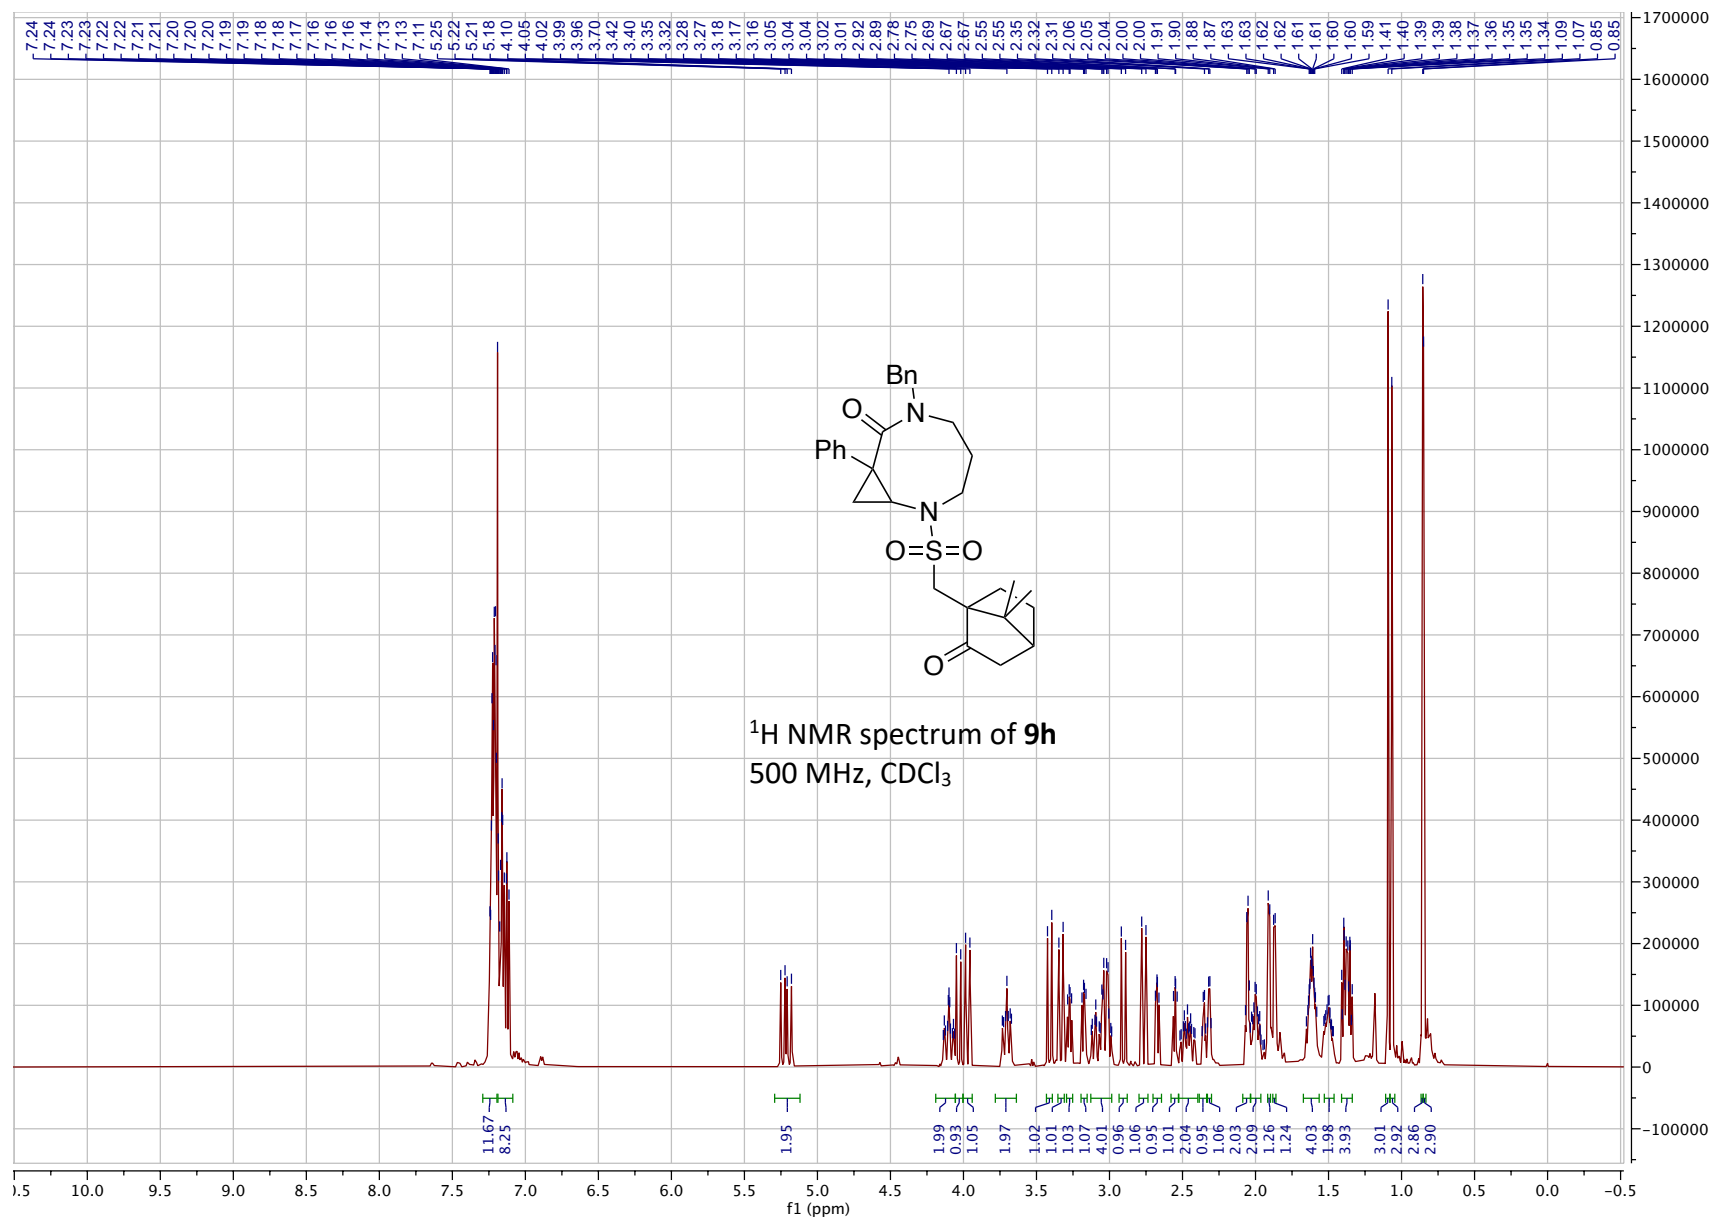



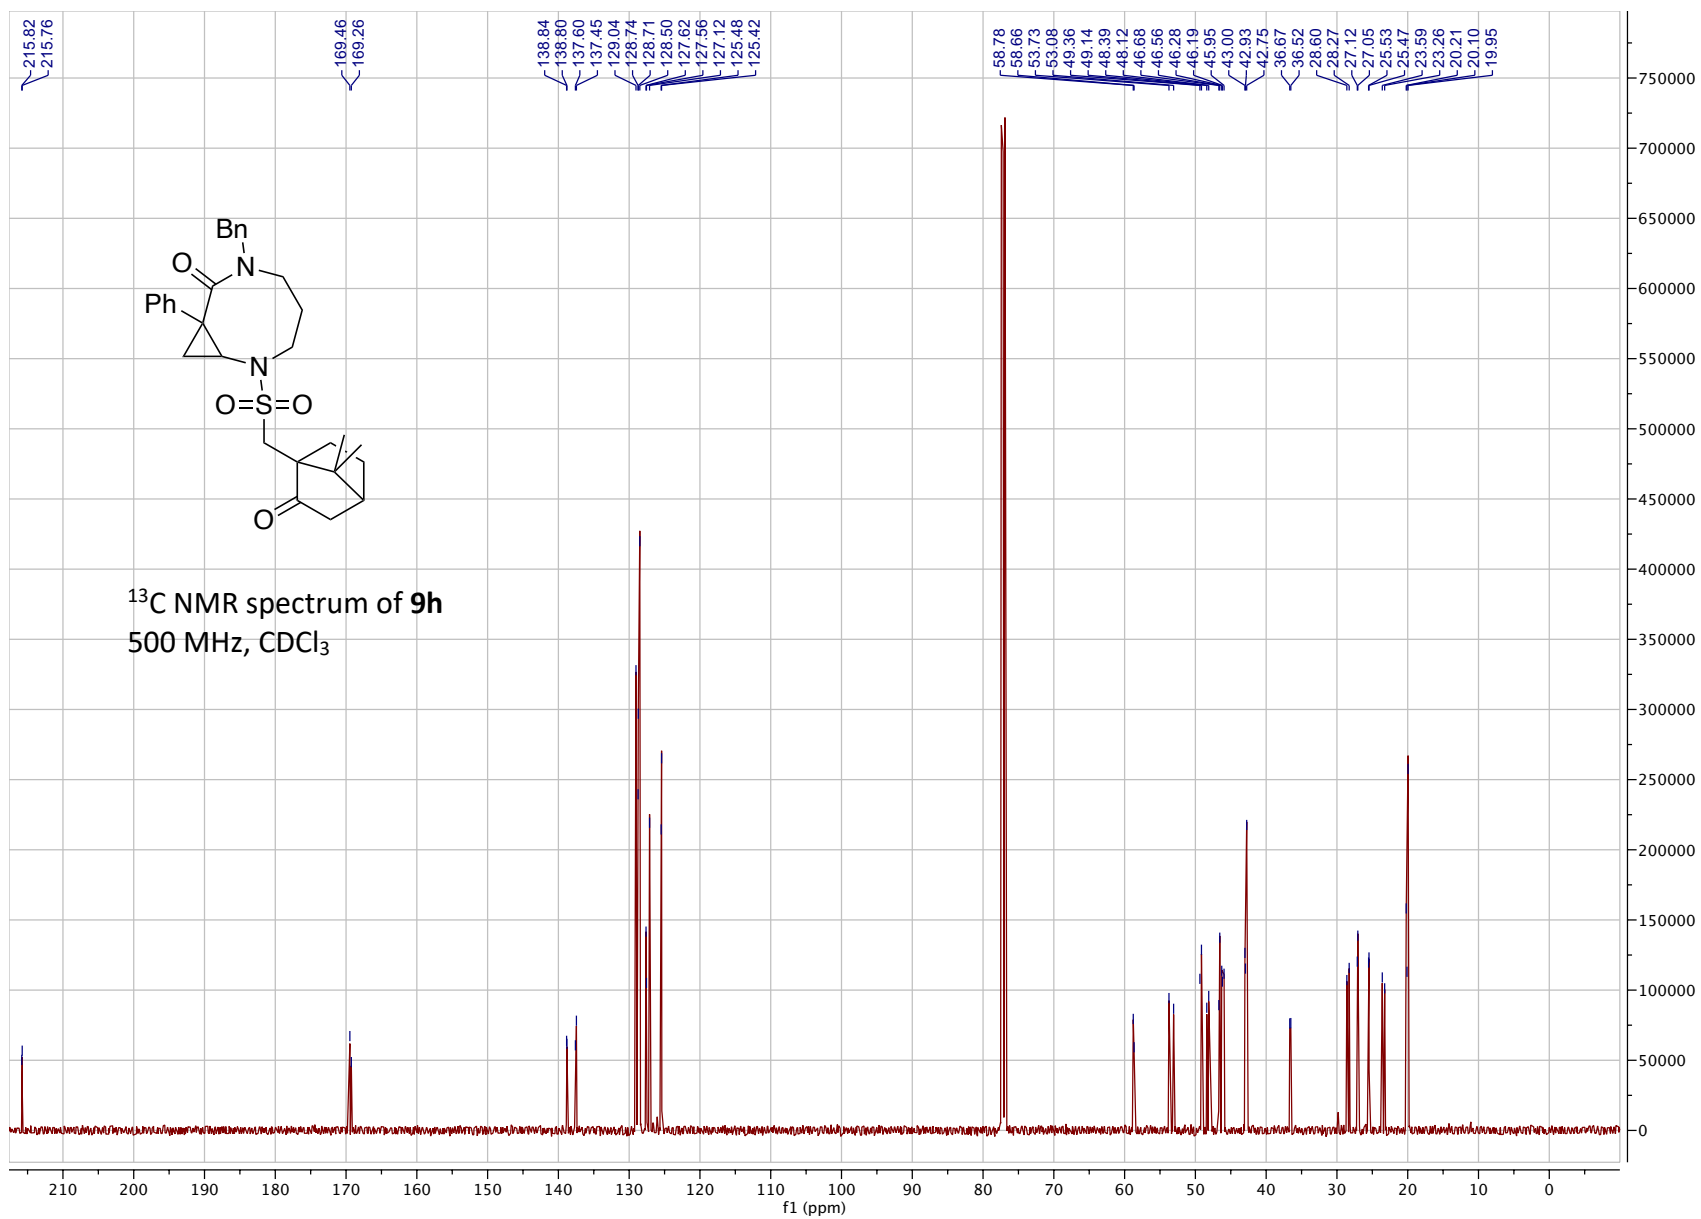

Supplement: d0ra09014j1.pdf [file d0ra09014j1.pdf]
